# Supplementary material for: Assembly of pinwheel/twist-shaped chiral lanthanide clusters with rotor structures by an annular/linear growth mechanism and their magnetic properties
Source: Royal Society of Chemistry journal article supplement (doi:10.1039/d2dt02653h), 2022-01-01
Supplement: d2dt02653h1.pdf [file d2dt02653h1.pdf]

## Supporting Information

Assembly of pinwheel/twist shaped chiral lanthanide clusters with rotor structures by annular/linear growth mechanism and their magnetic properties

*Bing-Fan Long,<sup>a,+</sup> Yun-Lan Li,<sup>a,+</sup> Zhong-Hong Zhu,<sup>a,\*</sup> Hai-Ling Wang,<sup>a</sup> Fu-Pei Liang,<sup>a,b,\*</sup> and Hua-Hong Zou<sup>a,\*</sup>*

<sup>a</sup>School of Chemistry and Pharmaceutical Sciences, State Key Laboratory for Chemistry and Molecular Engineering of Medicinal Resources/Key Laboratory for Chemistry and Molecular Engineering of Medicinal Resources (Ministry of Education of China), Collaborative Innovation Center for Guangxi Ethnic Medicine, School of Chemistry and Pharmaceutical Sciences, Guangxi Normal University, Guilin 541004, P. R. China

<sup>b</sup>Guangxi Key Laboratory of Electrochemical and Magnetochemical Functional Materials, College of Chemistry and Bioengineering, Guilin University of Technology, Guilin 541004, P. R. China

\*E-mail (Corresponding author): 18317725515@163.com (Z.-H. Zhu), liangfupei@glut.edu.cn (F.-P. Liang), gxnuchem@foxmail.com (H.-H. Zou).

**Keywords:** Chiral lanthanide clusters; solvothermal synthesis; annular growth mechanism; linear growth mechanism; magnetic properties

## Table of Contents:

| Supporting Tables  |                                                                                                                                                                                               |
|--------------------|-----------------------------------------------------------------------------------------------------------------------------------------------------------------------------------------------|
| <b>Table S1</b>    | Crystallographic data of the clusters <b>R-1</b> , <b>S-1</b> , <b>R-2</b> and <b>S-2</b> .                                                                                                   |
| <b>Table S2</b>    | Selected bond lengths (Å) and angles (°) of <b>R-1</b> .                                                                                                                                      |
| <b>Table S3</b>    | Selected bond lengths (Å) and angles (°) of <b>S-1</b> .                                                                                                                                      |
| <b>Table S4</b>    | Selected bond lengths (Å) and angles (°) of <b>R-2</b> .                                                                                                                                      |
| <b>Table S5</b>    | Selected bond lengths (Å) and angles (°) of <b>S-2</b> .                                                                                                                                      |
| <b>Table S6</b>    | <i>SHAPE</i> analysis of the Dy(III) in cluster <b>R-1</b> .                                                                                                                                  |
| <b>Table S7</b>    | <i>SHAPE</i> analysis of the Dy(III) in cluster <b>S-1</b> .                                                                                                                                  |
| <b>Table S8</b>    | <i>SHAPE</i> analysis of the Dy(III) in cluster <b>R-2</b> .                                                                                                                                  |
| <b>Table S9</b>    | <i>SHAPE</i> analysis of the Dy(III) in cluster <b>S-2</b> .                                                                                                                                  |
| <b>Table S10</b>   | Parameters from the fitting result of the Cole-Cole plots for <b>R-1</b> under 0 Oe field.                                                                                                    |
| <b>Table S11</b>   | Parameters from the fitting result of the Cole-Cole plots for <b>R-2</b> under 0 Oe field.                                                                                                    |
| <b>Table S12</b>   | Parameters from the fitting result of the Cole-Cole plots for <b>R-2</b> under 1000 Oe field.                                                                                                 |
| <b>Table S13</b>   | Parameters from the fitting result of the Cole-Cole plots for <b>S-1</b> under 0 Oe field.                                                                                                    |
| <b>Table S14</b>   | Parameters from the fitting result of the Cole-Cole plots for <b>S-2</b> under 0 Oe field.                                                                                                    |
| <b>Table S15</b>   | Parameters from the fitting result of the Cole-Cole plots for <b>S-2</b> under 1000 Oe field.                                                                                                 |
| Supporting Figures |                                                                                                                                                                                               |
| <b>Figure S1</b>   | Crystal structures of <b>R-1</b> (a); <b>S-1</b> (b); <b>R-2</b> (c); <b>S-2</b> (d).                                                                                                         |
| <b>Figure S2</b>   | Ligand coordination mode of cluster <b>R-1</b> (a); Coordination polyhedron around the Dy(III) ions of cluster <b>R-1</b> (b).                                                                |
| <b>Figure S3</b>   | Ligand coordination mode of cluster <b>R-2</b> (a); Coordination polyhedron around the Dy(III) ions of cluster <b>R-2</b> (b).                                                                |
| <b>Figure S4</b>   | Time-dependent HRESI-MS spectra of the initial cluster <b>R-1</b> reaction in positive mode (a); Positive HRESI-MS spectra of cluster <b>R-1</b> in MeOH (0, 20, 40, 60, 90 and 120 min) (b). |
| <b>Figure S5</b>   | Time-dependent HRESI-MS spectra of the initial cluster <b>R-2</b> reaction in positive mode (a); Positive HRESI-MS spectra of cluster <b>R-2</b> in MeOH (0, 20, 40, 60, 90 and 120 min) (b). |
| <b>Figure S6</b>   | Infrared spectra (IR) of clusters <b>R-1</b> , <b>S-1</b> , <b>R-2</b> and <b>S-2</b> (a, b).                                                                                                 |
| <b>Figure S7</b>   | TG curve of clusters <b>R-1</b> , <b>S-1</b> , <b>R-2</b> and <b>S-2</b> (a–d).                                                                                                               |
| <b>Figure S8</b>   | Powder diffraction pattern (PXRD) of clusters <b>R-1</b> , <b>S-1</b> , <b>R-2</b> and <b>S-2</b> (a–d).                                                                                      |
| <b>Figure S9</b>   | The UV-vis absorption spectra of clusters <b>R-1</b> , <b>S-1</b> , <b>R-2</b> and <b>S-2</b> (a–d).                                                                                          |
| <b>Figure S10</b>  | Plots of $\chi_m T$ versus T for clusters <b>R-1</b> and <b>R-2</b> (a, c). <i>M</i> vs. <i>H/T</i> plots of clusters <b>R-1</b> and <b>R-2</b> (b, d).                                       |

|                   |                                                                                                                                                                                                                                                                                                           |
|-------------------|-----------------------------------------------------------------------------------------------------------------------------------------------------------------------------------------------------------------------------------------------------------------------------------------------------------|
| <b>Figure S11</b> | Loop curve graph of clusters <b>R-1</b> and <b>R-2</b> at 2 K (a, b).                                                                                                                                                                                                                                     |
| <b>Figure S12</b> | Plots of $\chi''$ vs. $\nu$ (10–1000 Hz) at 2 K under 500–4000 Oe dc field with a 2 Oe oscillating ac field for cluster <b>R-2</b> (a); Variable-frequency AC susceptibilities ( $H = 1000$ Oe) of cluster <b>R-2</b> at different temperatures (b, c) and Cole-Cole plots from AC susceptibilities (d).  |
| <b>Figure S13</b> | Variable-frequency AC susceptibilities ( $H = 0$ Oe) of clusters <b>R-1</b> (a, b) and <b>R-2</b> (c, d) at different temperatures.                                                                                                                                                                       |
| <b>Figure S14</b> | Arrhenius plots generated from the temperature-dependent relaxation times extracted from the Cole-Cole fits of the AC susceptibilities for clusters <b>R-1</b> and <b>R-2</b> under 0 Oe (a, b). Symbols show the extracted times, and the lines are least-squares fits.                                  |
| <b>Figure S15</b> | Arrhenius plots generated from the temperature-dependent relaxation times extracted from the Cole-Cole fits of the AC susceptibilities for cluster <b>R-2</b> under 1000 Oe. Symbols show the extracted times, and the lines are least-squares fits.                                                      |
| <b>Figure S16</b> | Plots of $\chi_m T$ versus $T$ for clusters <b>S-1</b> and <b>S-2</b> (a, c); $M$ vs. $H/T$ plots of clusters <b>S-1</b> and <b>S-2</b> (b, d).                                                                                                                                                           |
| <b>Figure S17</b> | Loop curve graph of clusters <b>S-1</b> and <b>S-2</b> (a, b) at 2 K.                                                                                                                                                                                                                                     |
| <b>Figure S18</b> | Temperature-dependent $\chi'$ and $\chi''$ AC susceptibilities under 0 Oe DC fields for <b>S-1</b> and <b>S-2</b> (a, c); Cole–Cole plots for <b>S-1</b> and <b>S-2</b> (b, d).                                                                                                                           |
| <b>Figure S19</b> | Temperature-dependent $\chi'$ and $\chi''$ AC susceptibilities under 1000 Oe DC fields for <b>S-2</b> (a); Cole–Cole plots for <b>S-2</b> (b).                                                                                                                                                            |
| <b>Figure S20</b> | Arrhenius plots generated from the temperature-dependent relaxation times extracted from the Cole-Cole fits of the AC susceptibilities for clusters <b>S-1</b> and <b>S-2</b> under 0 Oe (a, b) and <b>S-2</b> under 1000 Oe (c). Symbols show the extracted times, and the lines are least-squares fits. |

## Experimental Section

### Materials and Measurements.

All chemicals and solvents were analytical grade and were used without further purification. The infrared spectra were carried out on a Pekin-Elmer Two spectrophotometer with pressed KBr pellets. The elemental analyses were determined on a Perkin-Elmer model 240 °C elemental analyzer. The powder X-ray diffraction (PXRD) spectra were measured on a Rigaku D/Max-3c diffractometer with Cu K $\alpha$  radiation ( $\lambda = 1.5418 \text{ \AA}$ ). Thermogravimetric analyses were performed on a PerkinElmer PyrisDiamond TG-DTA instrument under an N<sub>2</sub> atmosphere using a heating rate of 5 °C min<sup>-1</sup> from room temperature up to 1000 °C. The circular dichroism (CD) spectra were recorded on a JASCO J-1500 spectropolarimeter at room temperature. Magnetic properties were performed on a Superconducting Quantum Interference Device (SQUID) magnetometer. The diamagnetism of all constituent atoms was corrected with Pascal's constant.

### X-ray crystallography.

Single-crystal X-ray diffraction (SCXRD) data were collected on a ROD, Synergy Custom DW system, HyPix diffractometer (Cu-K $\alpha$  radiation and  $\lambda = 1.54184 \text{ \AA}$ ) in  $\Phi$  and  $\omega$  scan modes. The structures were solved by direct methods, and refined by a full-matrix least-squares method on the basis of  $F^2$  by using *SHELXL*.<sup>[1]</sup> Anisotropic thermal parameters were applied to all non-hydrogen atoms. Hydrogen atoms were generated geometrically. Highly disordered free solvent molecules were removed using the SQUEEZE function of PLATON. The crystallographic data for the ligand and clusters **R-1**, **S-1**, **R-2** and **S-2** are listed in Table S1, and selected bond lengths and angles are given in Table S2–S5. The CCDC reference numbers for the crystal structures of clusters **R-1**, **S-1**, **R-2** and **S-2** are 2183488–2183491, respectively.

[1] Sheldrick, G. M. *Acta Crystallogr., Sect. C: Struct. Chem.* **2015**, *71*, 3–8.

### The synthesis method.

**Synthesis of R-1:** **R-2**-hydroxy-2-phenylacetohydrazide (0.1 mmol, 0.0166 g), 2,3-dihydroxybenzaldehyde (0.1 mmol, 0.0138 g), DyCl<sub>3</sub>·6H<sub>2</sub>O (0.5 mmol, 0.1885 g) and triethylamine (80  $\mu$ L) were dissolved in a mixed solvent of ethanol (1.0 mL) and water (0.2 mL) in a Pyrex tube. The tube was sealed and heated at 80 °C in an oven for one day, then cooled down slowly, yellow block crystals were obtained with a yield of about 60% (based on **R-2**-hydroxy-2-

phenylacetohydrazide). Elemental analysis theoretical value ( $C_{82}H_{160}Cl_8Dy_8N_8O_{60}$ ): C, 25.90%; H, 4.24%; N, 2.94%; experimental value: C, 25.85%; H, 4.21%; N, 2.92%. Infrared spectrum data (IR, KBr pellet,  $cm^{-1}$ ): 3324(s), 2984(m), 1613(s), 1457(s), 1400(m), 1263(s), 1207(m), 1065(s), 872(m), 749(m), 701(w), 611(w).

**Synthesis of S-1:** The synthesis method was similar to that for **R-1** by using **S-2-hydroxy-2-phenylacetohydrazide** instead of **R-2-hydroxy-2-phenylacetohydrazide**. The yield is 60% (based on **S-2-hydroxy-2-phenylacetohydrazide**). Elemental analysis theoretical value ( $C_{88}H_{184}Cl_8Dy_8N_8O_{66}$ ): C, 26.46%; H, 4.64%; N, 2.80%; experimental value: C, 26.41%; H, 4.62%; N, 2.76%. Infrared spectrum data (IR, KBr pellet,  $cm^{-1}$ ): 3315(s), 2978(m), 1604(s), 1554(m), 1457(s), 1393(m), 1267(s), 1212(m), 1060(s), 875(m), 746(m), 702(w), 604(w).

**Synthesis of R-2:** **R-2-hydroxy-2-phenylacetohydrazide** (0.1 mmol, 0.0166 g), **2,3-dihydroxybenzaldehyde** (0.1 mmol, 0.0138 g),  $Dy(NO_3)_3 \cdot 6H_2O$  (0.5 mmol, 0.1885 g) and triethylamine (80  $\mu$ L) were dissolved in a mixed solvent of methanol (1.0 mL) and water (0.2 mL) in a Pyrex tube. The tube was sealed and heated at 80 °C in an oven for one day, then cooled down slowly, yellow rhombic crystals were obtained with a yield of about 65% (based on **R-2-hydroxy-2-phenylacetohydrazide**). Elemental analysis theoretical value ( $C_{107}H_{174}Dy_6N_{14}O_{68}$ ): C, 34.55%; H, 4.71%; N, 5.27%; experimental value: C, 34.53%; H, 4.67%; N, 5.22%. Infrared spectrum data (IR, KBr pellet,  $cm^{-1}$ ): 3408(s), 2980(m), 1614(s), 1453(s), 1384(s), 1263(s), 1206(m), 1060(s), 872(m), 739(s), 602(w).

**Synthesis of S-2:** The synthesis method was similar to that for **R-2** by using **S-2-hydroxy-2-phenylacetohydrazide** instead of **R-2-hydroxy-2-phenylacetohydrazide**. The yield is 65 % (based on **S-2-hydroxy-2-phenylacetohydrazide**). Elemental analysis theoretical value ( $C_{107}H_{168}Dy_6N_{14}O_{67}$ ): C, 34.75%; H, 4.58%; N, 5.30%; experimental value: C, 34.72%; H, 4.53%; N, 5.28%. Infrared spectrum data (IR, KBr pellet,  $cm^{-1}$ ): 3415(s), 2982(s), 1607(s), 1453(s), 1387(s), 1259(s), 1205(m), 1060(s), 872(m), 738(s), 605(w).

**Table S1.** Crystallographic data of the clusters **R-1**, **S-1**, **R-2** and **S-2**.

|                                                                          | <b>R-1</b>                                                                                      | <b>S-1</b>                                                                                      | <b>R-2</b>                                                                        | <b>S-2</b>                                                                        |
|--------------------------------------------------------------------------|-------------------------------------------------------------------------------------------------|-------------------------------------------------------------------------------------------------|-----------------------------------------------------------------------------------|-----------------------------------------------------------------------------------|
| Formula                                                                  | C <sub>82</sub> H <sub>160</sub> Cl <sub>8</sub> Dy <sub>8</sub> N <sub>8</sub> O <sub>60</sub> | C <sub>88</sub> H <sub>184</sub> Cl <sub>8</sub> Dy <sub>8</sub> N <sub>8</sub> O <sub>66</sub> | C <sub>107</sub> H <sub>174</sub> Dy <sub>6</sub> N <sub>14</sub> O <sub>68</sub> | C <sub>107</sub> H <sub>168</sub> Dy <sub>6</sub> N <sub>14</sub> O <sub>67</sub> |
| Formula weight                                                           | 3801.77                                                                                         | 3994.02                                                                                         | 3719.59                                                                           | 3697.54                                                                           |
| <i>T</i> , K                                                             | 100.00(10)                                                                                      | 100.00(10)                                                                                      | 100.00(10)                                                                        | 100.00(10)                                                                        |
| Crystal system                                                           | monoclinic                                                                                      | monoclinic                                                                                      | tetragonal                                                                        | tetragonal                                                                        |
| Space group                                                              | <i>C2</i>                                                                                       | <i>C2</i>                                                                                       | <i>P4<sub>3</sub>2<sub>1</sub>2</i>                                               | <i>P4<sub>1</sub>2<sub>1</sub>2</i>                                               |
| <i>a</i> , Å                                                             | 19.582(16)                                                                                      | 19.561(10)                                                                                      | 14.400(10)                                                                        | 14.414(10)                                                                        |
| <i>b</i> , Å                                                             | 18.453(15)                                                                                      | 18.409(10)                                                                                      | 14.400(10)                                                                        | 14.414(10)                                                                        |
| <i>c</i> , Å                                                             | 19.787(14)                                                                                      | 19.748(10)                                                                                      | 71.412(5)                                                                         | 71.463(4)                                                                         |
| $\alpha$ , °                                                             | 90                                                                                              | 90                                                                                              | 90                                                                                | 90                                                                                |
| $\beta$ , °                                                              | 92.1497(7)                                                                                      | 92.095(10)                                                                                      | 90                                                                                | 90                                                                                |
| $\gamma$ , °                                                             | 90                                                                                              | 90                                                                                              | 90                                                                                | 90                                                                                |
| <i>V</i> , Å <sup>3</sup>                                                | 7145.45(10)                                                                                     | 7107.00(6)                                                                                      | 14809.2(2)                                                                        | 14848.7(2)                                                                        |
| <i>Z</i>                                                                 | 2                                                                                               | 2                                                                                               | 4                                                                                 | 4                                                                                 |
| <i>D</i> <sub>c</sub> , g cm <sup>-3</sup>                               | 1.559                                                                                           | 1.524                                                                                           | 1.389                                                                             | 1.469                                                                             |
| $\mu$ , mm <sup>-1</sup>                                                 | 23.877                                                                                          | 23.979                                                                                          | 16.479                                                                            | 16.514                                                                            |
| <i>F</i> (000)                                                           | 3200.0                                                                                          | 3096.0                                                                                          | 6024.0                                                                            | 6432.0                                                                            |
| 2 $\theta$ range for data collection/°                                   | 4.468 to 133.192                                                                                | 4.478 to 154.102                                                                                | 4.95 to 151.65                                                                    | 4.946 to 151.458                                                                  |
| Reflns coll.                                                             | 44229                                                                                           | 50425                                                                                           | 52013                                                                             | 49848                                                                             |
| Unique reflns                                                            | 12550                                                                                           | 14029                                                                                           | 14821                                                                             | 14921                                                                             |
| <i>R</i> <sub>int</sub>                                                  | 0.0453                                                                                          | 0.0432                                                                                          | 0.0429                                                                            | 0.0449                                                                            |
| <i>R</i> <sub>1</sub> <sup>a</sup> ( <i>I</i> > 2 $\sigma$ ( <i>I</i> )) | 0.0676                                                                                          | 0.0433                                                                                          | 0.0449                                                                            | 0.0411                                                                            |
| <i>wR</i> <sub>2</sub> <sup>b</sup> (all data)                           | 0.1765                                                                                          | 0.1171                                                                                          | 0.1311                                                                            | 0.1122                                                                            |
| GOF                                                                      | 1.098                                                                                           | 1.073                                                                                           | 1.084                                                                             | 1.061                                                                             |
| Flack parameter                                                          | 0.077(9)                                                                                        | 0.019(5)                                                                                        | 0.015(5)                                                                          | 0.001(2)                                                                          |

$$^a R_1 = \frac{\sum ||F_o| - |F_c||}{\sum |F_o|}, \quad ^b wR_2 = [\frac{\sum w(F_o^2 - F_c^2)^2}{\sum w(F_o^2)^2}]^{1/2}$$

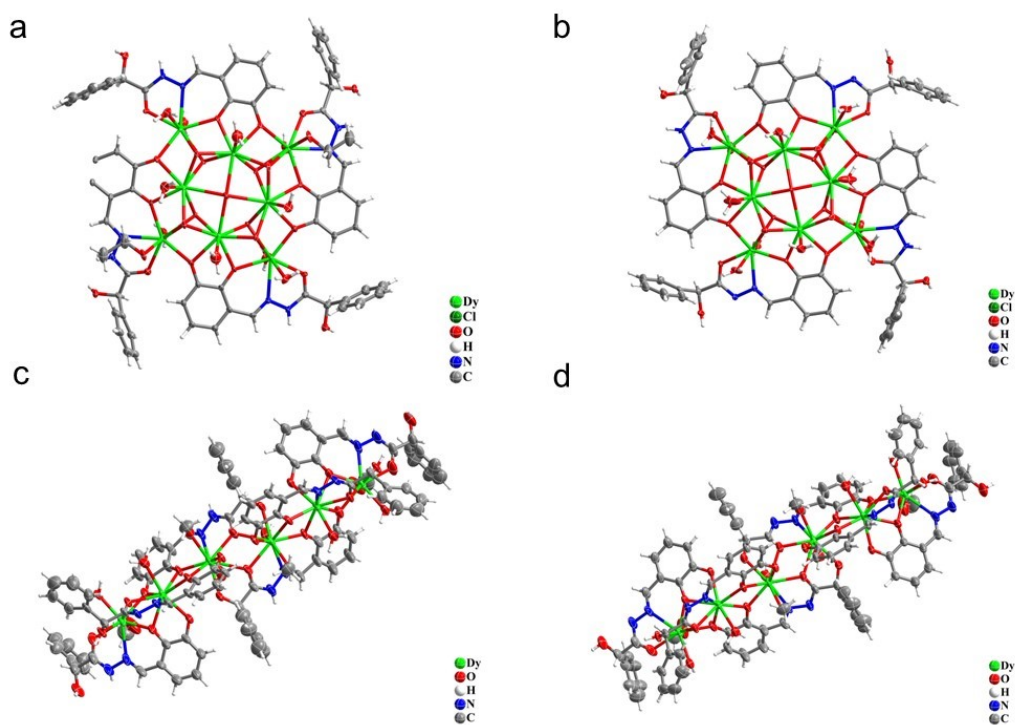

**Figure S1.** Crystal structures of *R*-1 (a); *S*-1 (b); *R*-2 (c); *S*-2 (d).

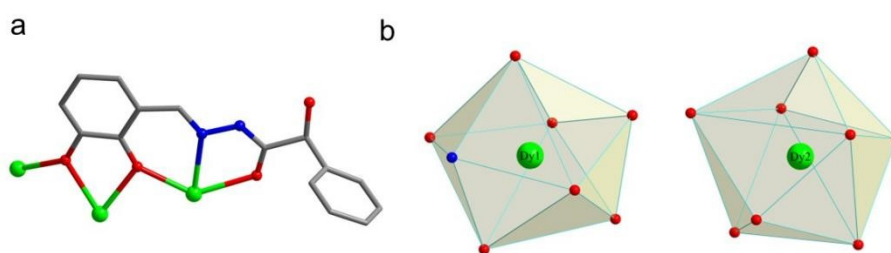

**Figure S2.** Ligand coordination mode of cluster *R*-1 (a); Coordination polyhedron around the Dy(III) ions of cluster *R*-1 (b).

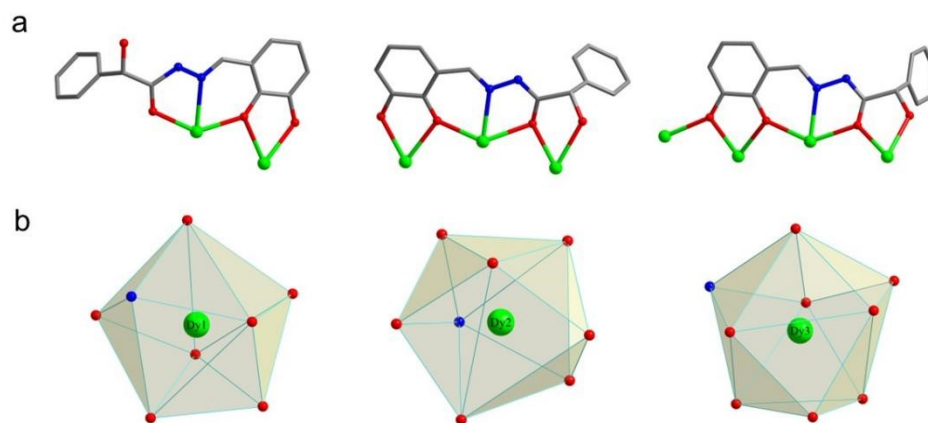

**Figure S3.** Ligand coordination mode of cluster **R-2** (a); Coordination polyhedron around the Dy(III) ions of cluster **R-2** (b).



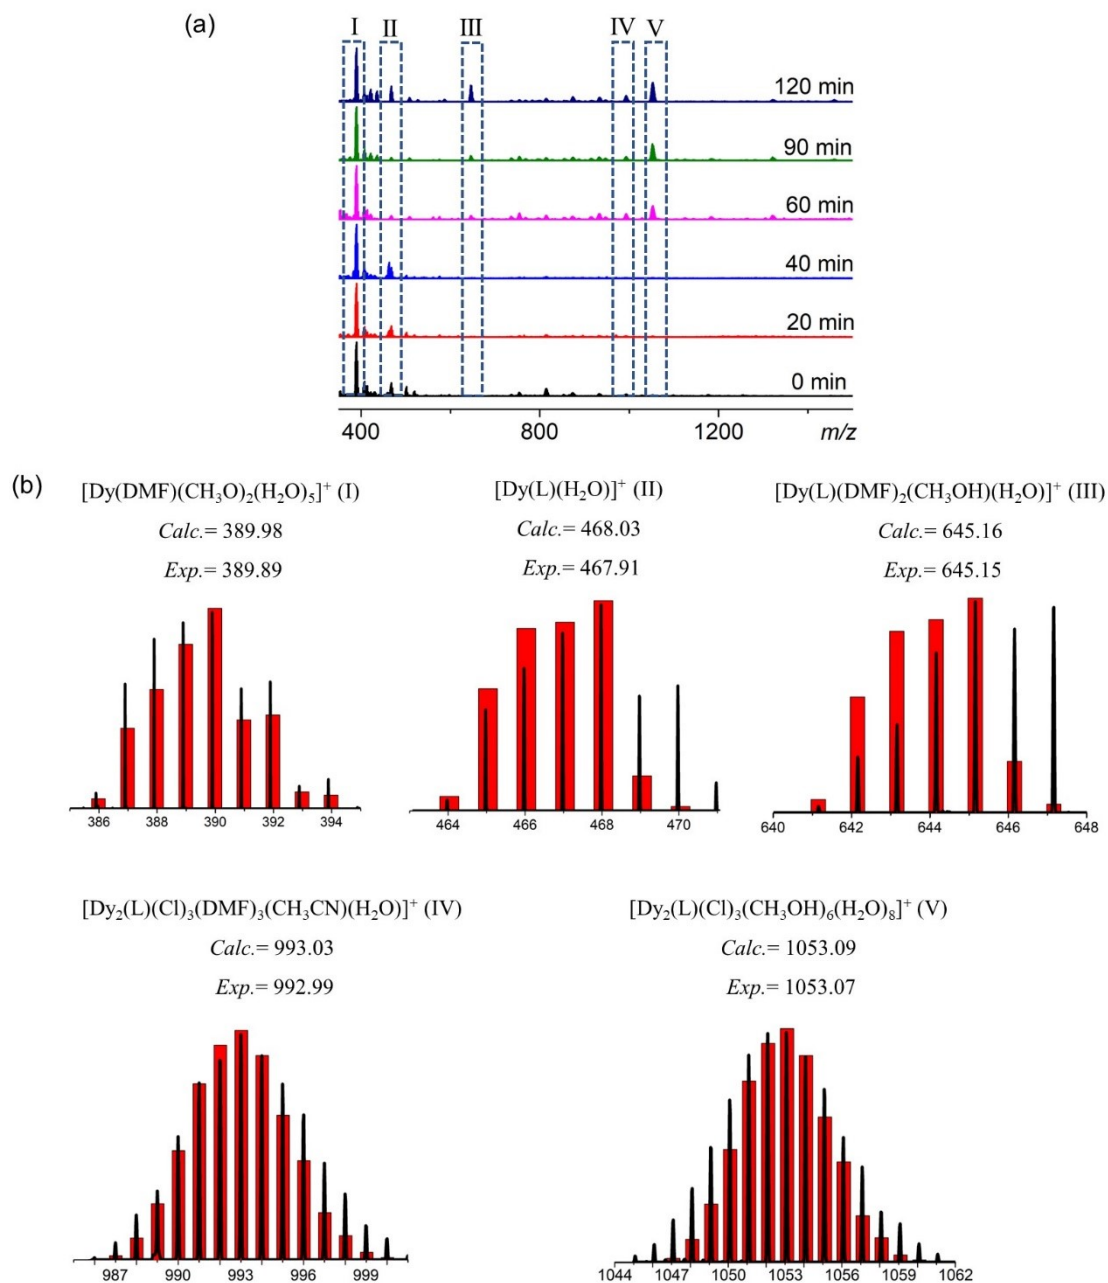

**Figure S4.** Time-dependent HRESI-MS spectra of the initial cluster **R-1** reaction in positive mode (a); Positive HRESI-MS spectra of cluster **R-1** in MeOH (0, 20, 40, 60, 90 and 120 min) (b).

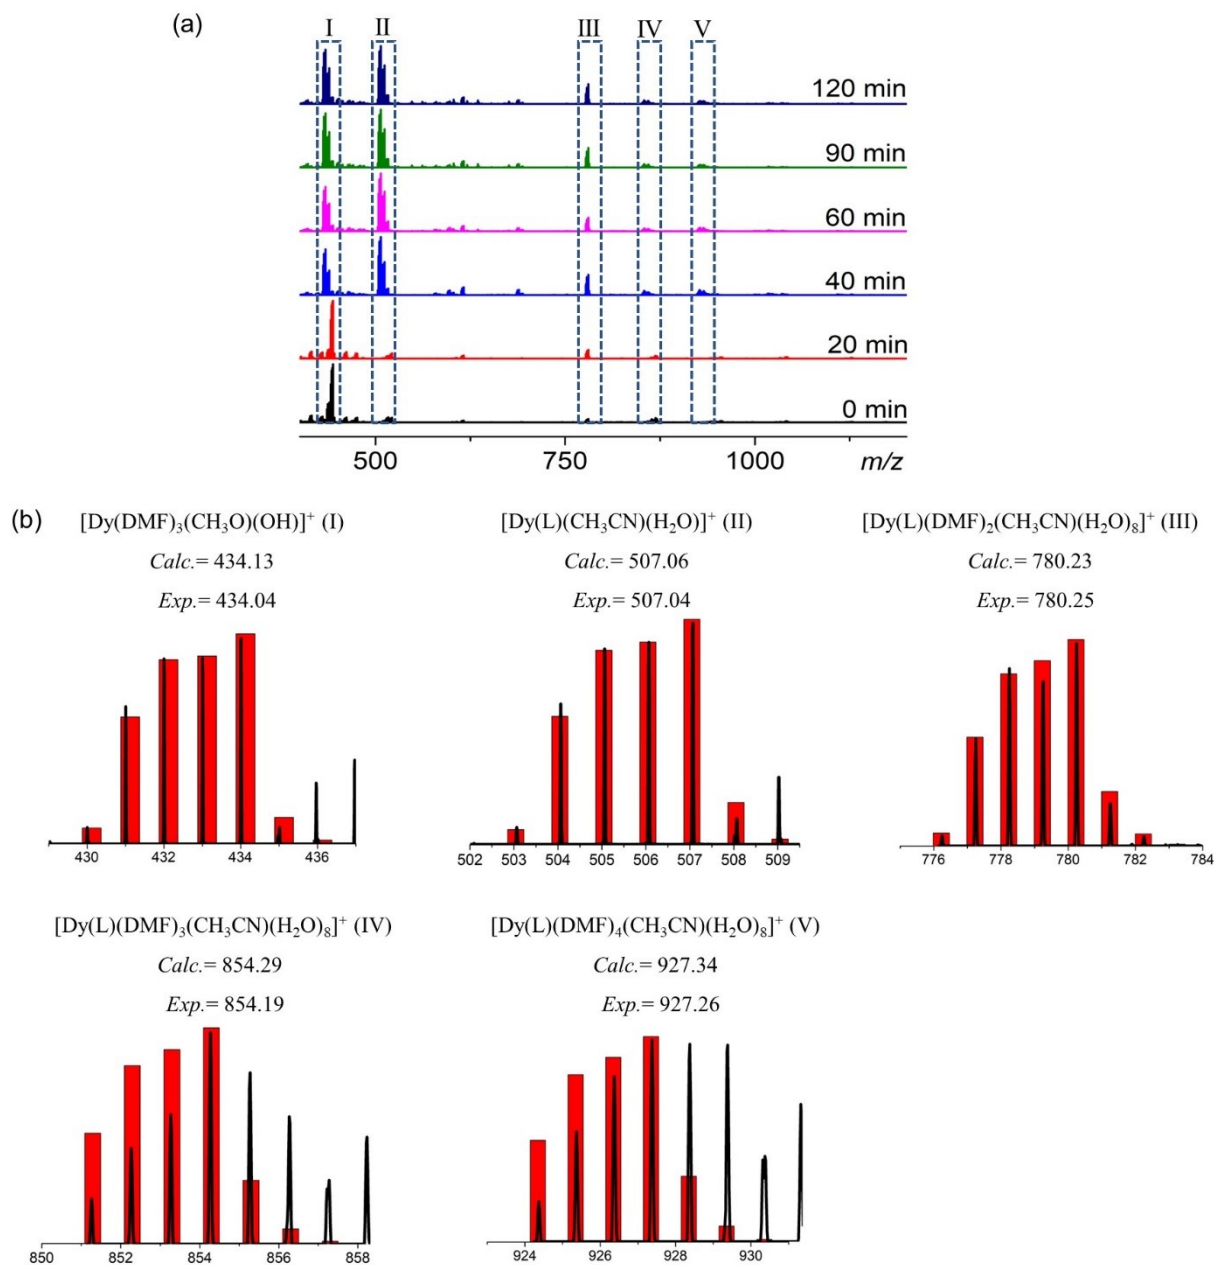

**Figure S5.** Time-dependent HRESI-MS spectra of the initial cluster **R-2** reaction in positive mode (a); Positive HRESI-MS spectra of cluster **R-2** in MeOH (0, 20, 40, 60, 90 and 120 min) (b).

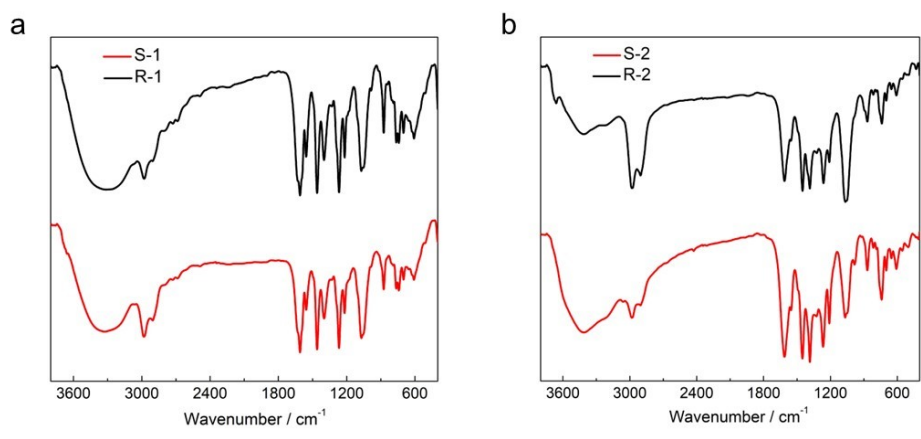

**Figure S6.** Infrared spectra (IR) of clusters *R-1*, *S-1*, *R-2* and *S-2* (a, b).

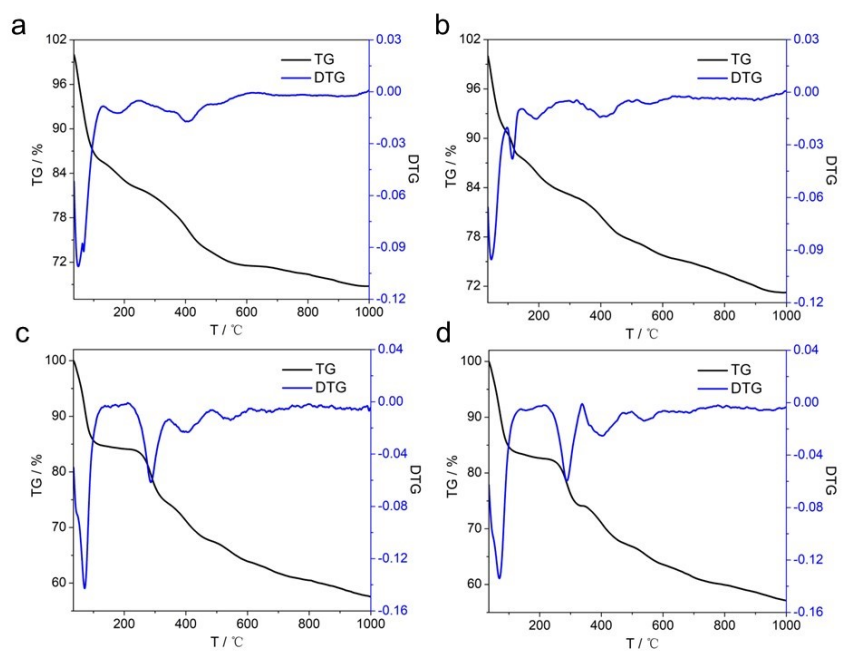

**Figure S7.** TG curve of clusters *R-1*, *S-1*, *R-2* and *S-2* (a–d).

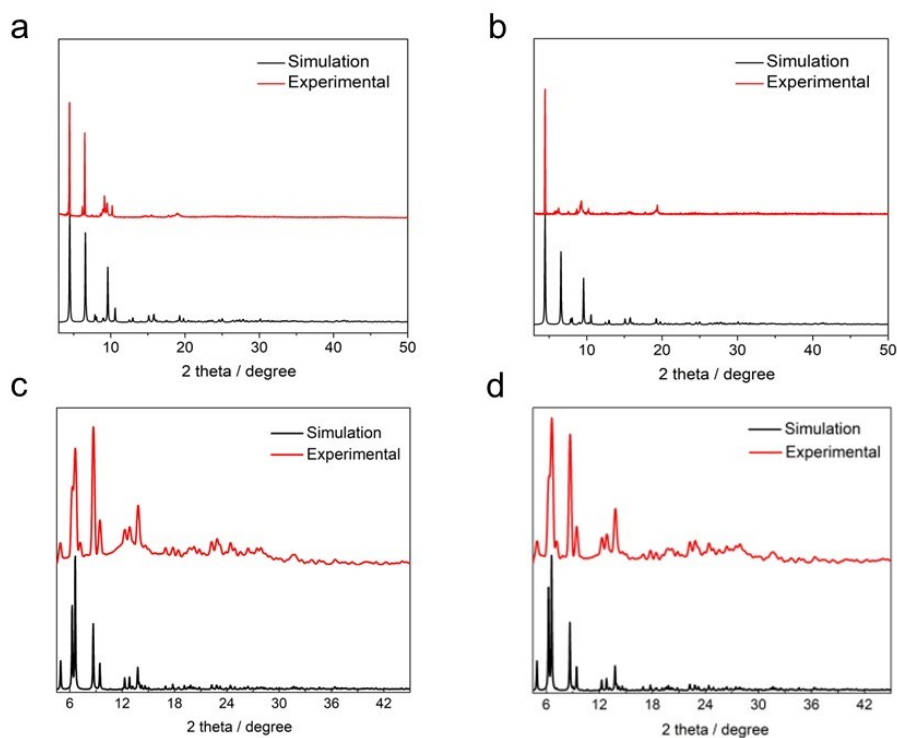

**Figure S8.** Powder diffraction pattern (PXRD) of clusters *R-1*, *S-1*, *R-2* and *S-2* (a–d).

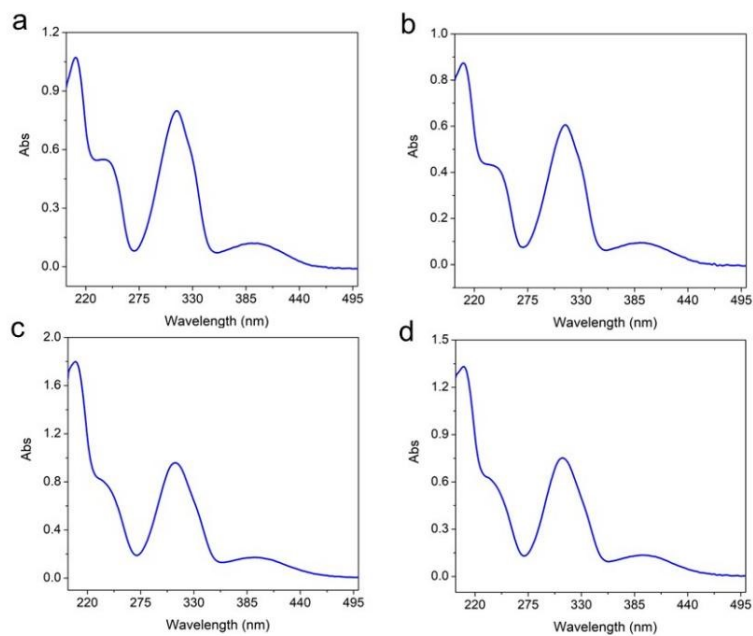

**Figure S9.** The UV-Vis absorption spectra of clusters *R-1*, *S-1*, *R-2* and *S-2* (a–d).

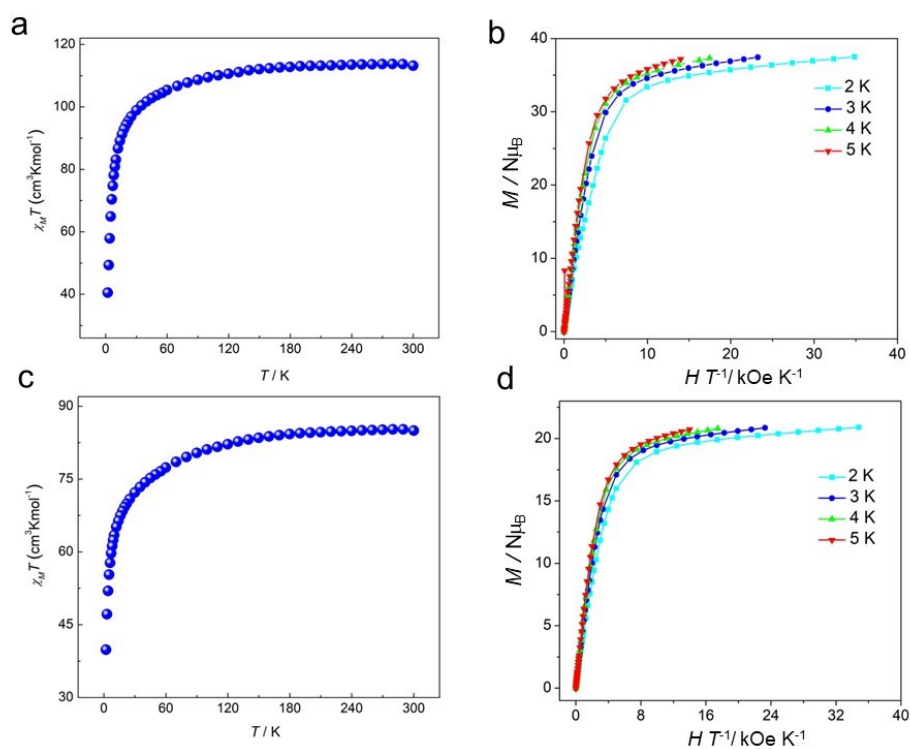

**Figure S10.** Plots of  $\chi_m T$  versus  $T$  for clusters **R-1** and **R-2** (a, c);  $M$  vs.  $H/T$  plots of clusters **R-1** and **R-2** (b, d).

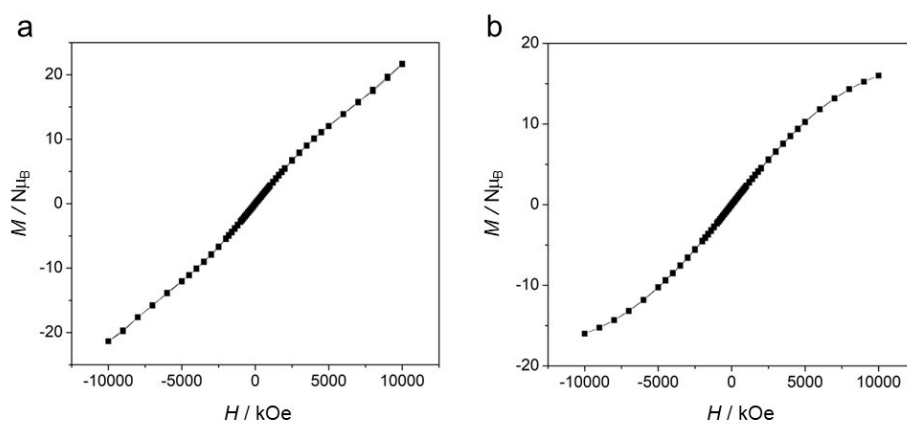

**Figure S11.** Loop curve graph of clusters **R-1** and **R-2** (a, b) at 2 K.

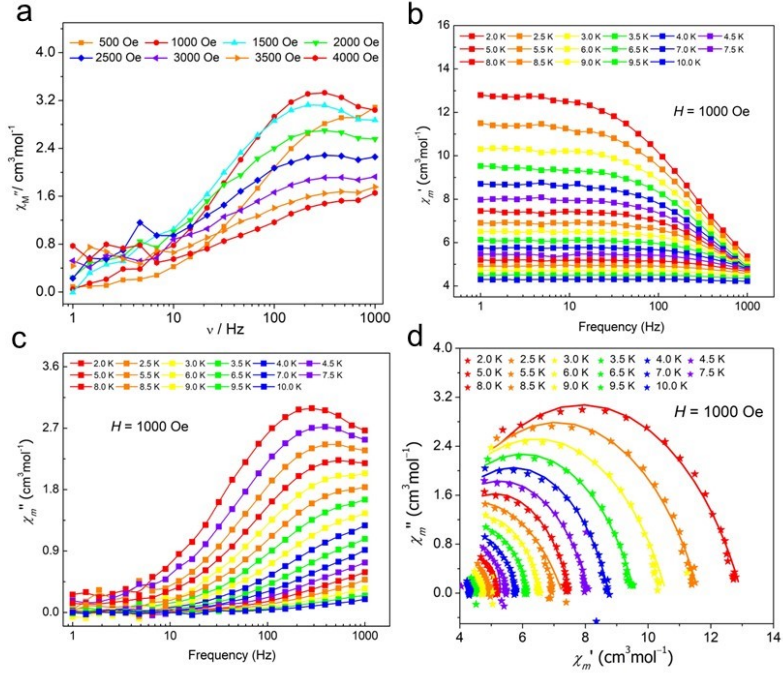

**Figure S12.** Plots of  $\chi''$  vs.  $\nu$  (10–1000 Hz) at 2 K under 500–4000 Oe dc field with a 2 Oe oscillating ac field for cluster **R-2** (a); Variable-frequency AC susceptibilities ( $H = 1000$  Oe) of cluster **R-2** at different temperatures (b, c) and Cole-Cole plots from AC susceptibilities (d).

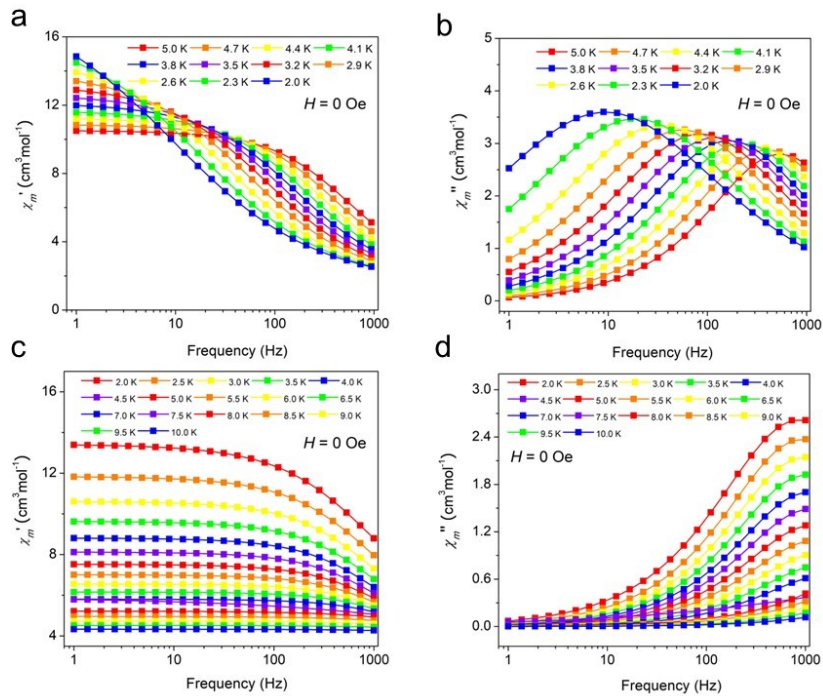

**Figure S13.** Variable-frequency AC susceptibilities ( $H = 0$  Oe) of clusters **R-1** (a, b) and **R-2** (c, d) at different temperatures.

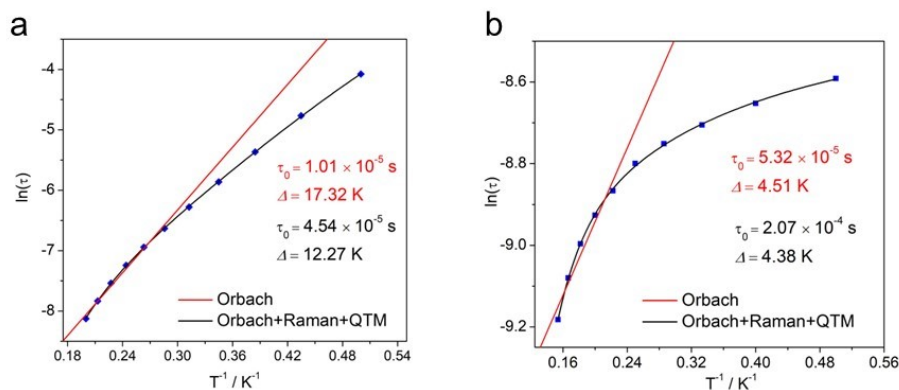

**Figure S14.** Arrhenius plots generated from the temperature-dependent relaxation times extracted from the Cole-Cole fits of the AC susceptibilities for clusters **R-1** and **R-2** under 0 Oe (a, b). Symbols show the extracted times, and the lines are least-squares fits.

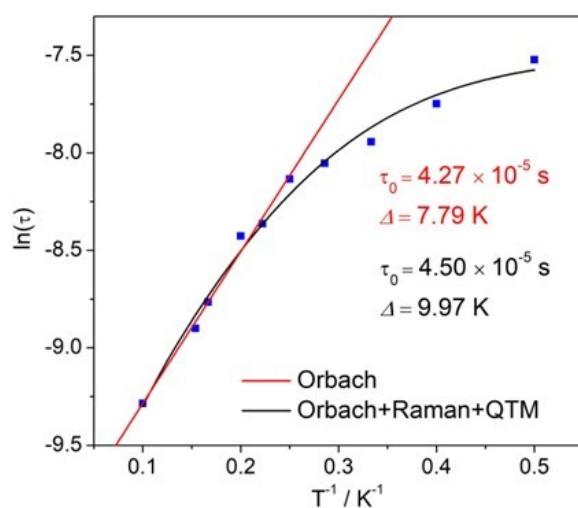

**Figure S15.** Arrhenius plots generated from the temperature-dependent relaxation times extracted from the Cole-Cole fits of the AC susceptibilities for cluster **R-2** under 1000 Oe. Symbols show the extracted times, and the lines are least-squares fits.

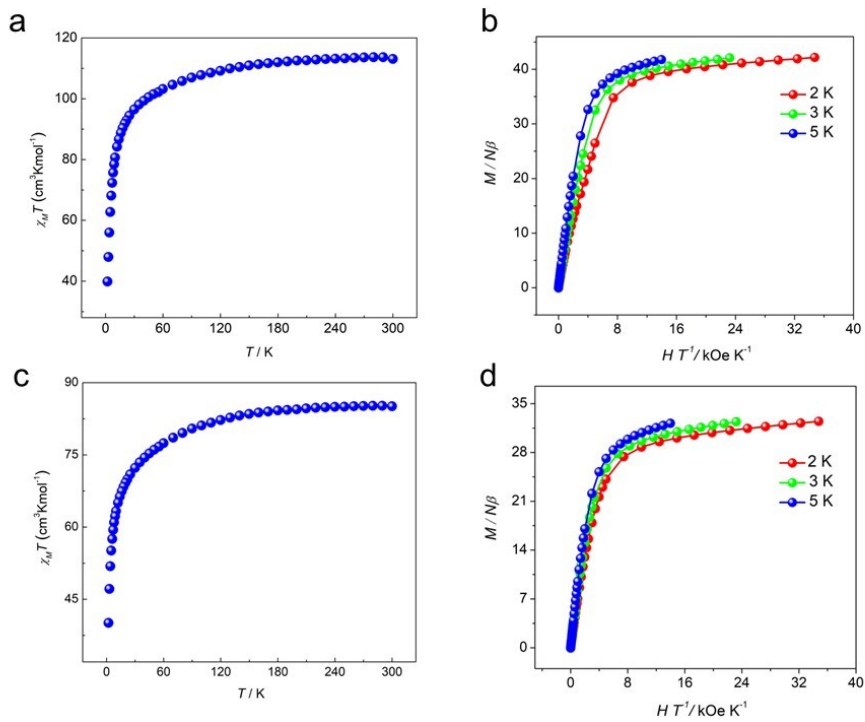

**Figure S16.** Plots of  $\chi_m T$  versus  $T$  for clusters **S-1** and **S-2** (a, c);  $M$  vs.  $H/T$  plots of clusters **S-1** and **S-2** (b, d).

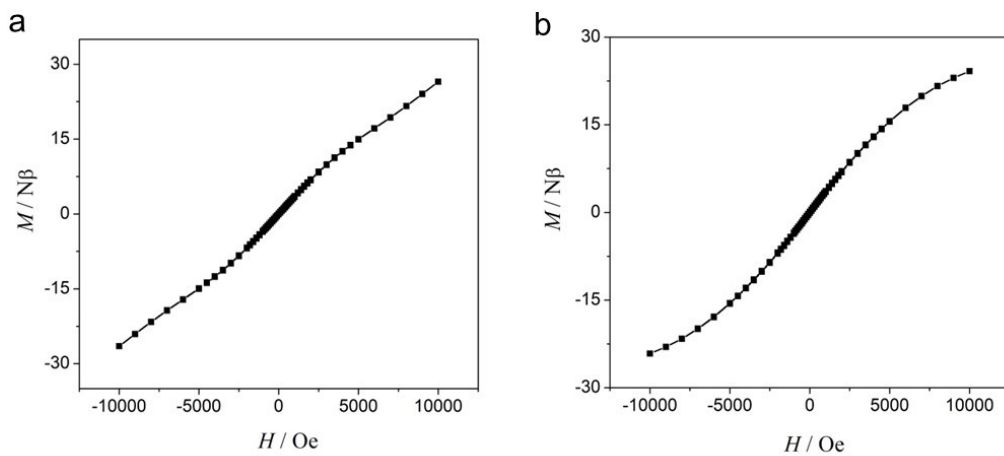

**Figure S17.** Loop curve graph of clusters **S-1** and **S-2** (a, b) at 2 K.



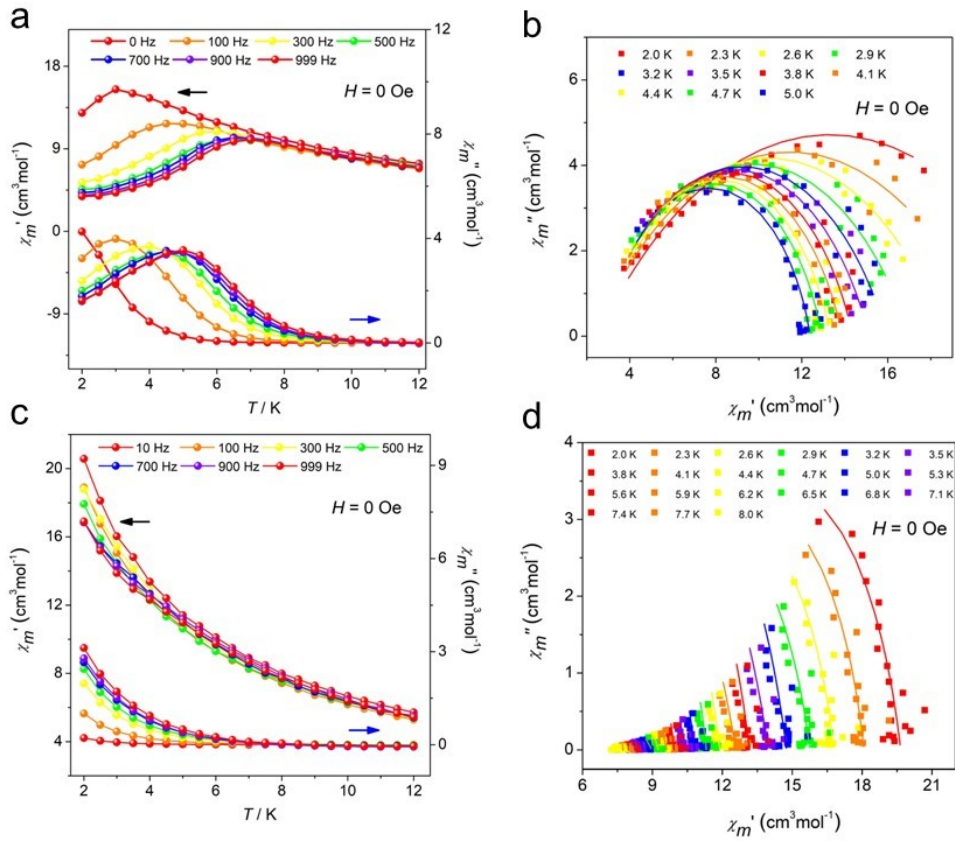

**Figure S18.** Temperature-dependent  $\chi'$  and  $\chi''$  AC susceptibilities under 0 Oe DC fields for **S-1** and **S-2** (a, c); Cole–Cole plots for **S-1** and **S-2** (b, d).

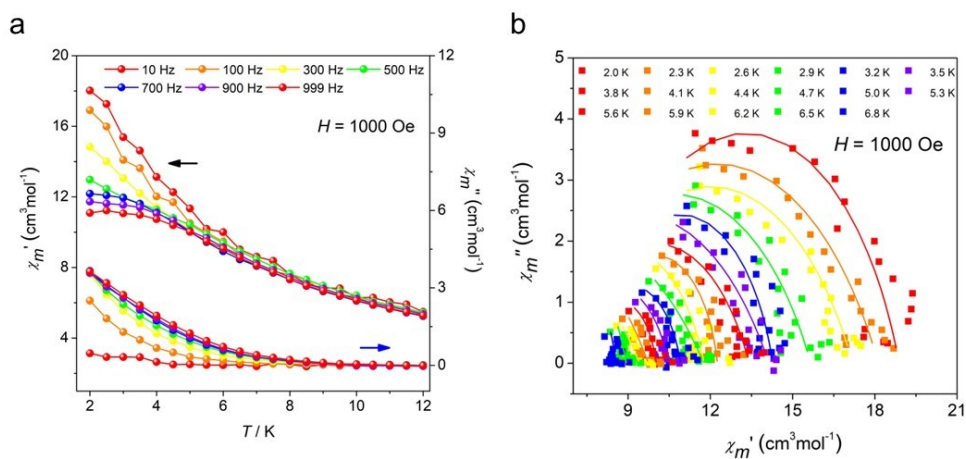

**Figure S19.** Temperature-dependent  $\chi'$  and  $\chi''$  AC susceptibilities under 1000 Oe DC fields for **S-2** (a); Cole–Cole plots for **S-2** (b).

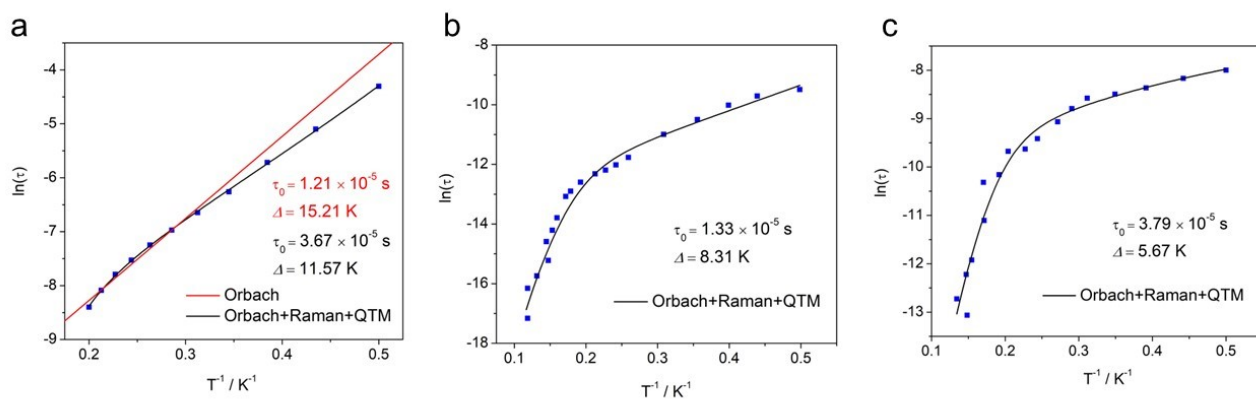

**Figure S20.** Arrhenius plots generated from the temperature-dependent relaxation times extracted from the Cole-Cole fits of the AC susceptibilities for clusters **S-1** and **S-2** under 0 Oe (a, b) and **S-2** under 1000 Oe (c). Symbols show the extracted times, and the lines are least-squares fits.

**Table S2.** Selected bond lengths (Å) and angles (°) of cluster **R-1**.

| Bond lengths (Å)    |           |             |           |                      |           |
|---------------------|-----------|-------------|-----------|----------------------|-----------|
| Dy1-O10             | 2.416(11) | Dy2-O3      | 2.330(11) | Dy3-N4               | 2.536(13) |
| Dy1-O17             | 2.361(15) | Dy2-O9      | 2.412(10) | Dy3-O15              | 2.372(12) |
| Dy1-O3              | 2.289(10) | Dy2-O11     | 2.327(9)  | Dy4-O12              | 2.323(11) |
| Dy1-O2              | 2.395(11) | Dy2-O23     | 2.321(18) | Dy4-O10 <sup>i</sup> | 2.335(10) |
| Dy1-O9              | 2.459(10) | Dy2-O33     | 2.586(5)  | Dy4-O9 <sup>i</sup>  | 2.381(10) |
| Dy1-O8 <sup>i</sup> | 2.271(11) | Dy3-O14     | 2.367(12) | Dy4-O11              | 2.381(10) |
| Dy1-N2              | 2.543(14) | Dy3-O12     | 2.417(10) | Dy4-O16              | 2.371(11) |
| Dy1-O18             | 2.345(12) | Dy3-O4      | 2.255(11) | Dy4-O7               | 2.348(10) |
| Dy2-O12             | 2.351(10) | Dy3-O6      | 2.359(12) | Dy4-O8               | 2.334(11) |
| Dy2-O10             | 2.317(10) | Dy3-O11     | 2.425(10) | Dy4-O33              | 2.632(5)  |
| Dy2-O4              | 2.357(11) | Dy3-O7      | 2.245(10) |                      |           |
| Bond angles (°)     |           |             |           |                      |           |
| O10-Dy1-O9          | 60.6(3)   | O3-Dy2-O9   | 73.7(4)   | O14-Dy3-O12          | 132.7(4)  |
| O10-Dy1-N2          | 129.3(4)  | O3-Dy2-O33  | 146.5(3)  | O14-Dy3-O11          | 73.0(4)   |
| O17-Dy1-O10         | 136.9(4)  | O9-Dy2-O33  | 77.9(4)   | O14-Dy3-N4           | 79.2(4)   |
| O17-Dy1-O2          | 72.3(5)   | O11-Dy2-O12 | 62.2(3)   | O14-Dy3-O15          | 149.3(4)  |

|                          |          |             |          |                                       |          |
|--------------------------|----------|-------------|----------|---------------------------------------|----------|
| O17-Dy1-O9               | 76.6(4)  | O11-Dy2-O4  | 77.5(4)  | O15-Dy3-O12                           | 77.8(4)  |
| O17-Dy1-N2               | 78.5(5)  | O11-Dy2-O3  | 116.6(4) | O15-Dy3-O11                           | 137.7(4) |
| O3-Dy1-O10               | 73.4(4)  | O11-Dy2-O9  | 83.2(3)  | O15-Dy3-N4                            | 75.5(4)  |
| O3-Dy1-O17               | 90.5(5)  | O11-Dy2-O33 | 76.6(4)  | O7-Dy3-N4                             | 71.2(4)  |
| O3-Dy1-O2                | 135.7(4) | O23-Dy2-O12 | 77.4(5)  | O12-Dy4-O10 <sup>i</sup>              | 133.0(4) |
| O3-Dy1-O9                | 73.5(3)  | O23-Dy2-O4  | 79.8(5)  | O12-Dy4-O9 <sup>i</sup>               | 141.7(3) |
| O3-Dy1-N2                | 71.4(4)  | O23-Dy2-O3  | 85.2(5)  | O12-Dy4-O11                           | 61.8(3)  |
| O3-Dy1-O18               | 97.6(5)  | O23-Dy2-O9  | 138.7(5) | O12-Dy4-O16                           | 75.1(4)  |
| O2-Dy1-O10               | 144.6(4) | O23-Dy2-O11 | 138.0(5) | O12-Dy4-O7                            | 75.0(4)  |
| O2-Dy1-O9                | 136.1(4) | O23-Dy2-O33 | 105.4(7) | O12-Dy4-O8                            | 138.0(4) |
| O2-Dy1-N2                | 65.4(4)  | O10-Dy2-O33 | 76.8(3)  | O12-Dy4-O33                           | 75.4(3)  |
| O9-Dy1-N2                | 136.3(4) | O4-Dy2-O9   | 121.1(4) | O10 <sup>i</sup> -Dy4-O9 <sup>i</sup> | 62.9(4)  |
| O8 <sup>i</sup> -Dy1-O10 | 72.6(4)  | O4-Dy2-O33  | 145.4(3) | O10 <sup>i</sup> -Dy4-O11             | 140.3(3) |
| O8 <sup>i</sup> -Dy1-O17 | 102.9(5) | O3-Dy2-O12  | 137.6(4) | O10 <sup>i</sup> -Dy4-O16             | 77.4(4)  |
| O8 <sup>i</sup> -Dy1-O3  | 142.0(4) | O12-Dy3-O11 | 59.9(3)  | O10 <sup>i</sup> -Dy4-O7              | 140.4(3) |
| O8 <sup>i</sup> -Dy1-O2  | 82.3(4)  | O12-Dy3-N4  | 133.1(4) | O10 <sup>i</sup> -Dy4-O33             | 75.6(3)  |
| O8 <sup>i</sup> -Dy1-O9  | 75.3(4)  | O4-Dy3-O14  | 101.6(4) | O9 <sup>i</sup> -Dy4-O33              | 77.5(4)  |
| O8 <sup>i</sup> -Dy1-N2  | 145.8(4) | O4-Dy3-O12  | 72.4(4)  | O11-Dy4-O9 <sup>i</sup>               | 85.2(3)  |
| O8 <sup>i</sup> -Dy1-O18 | 92.0(4)  | O4-Dy3-O6   | 79.7(4)  | O11-Dy4-O33                           | 74.8(4)  |
| O18-Dy1-O10              | 78.7(4)  | O4-Dy3-O11  | 77.4(4)  | O16-Dy4-O9 <sup>i</sup>               | 138.6(4) |
| O18-Dy1-O17              | 144.0(5) | O4-Dy3-N4   | 143.6(4) | O16-Dy4-O11                           | 135.8(4) |
| O18-Dy1-O2               | 77.7(5)  | O4-Dy3-O15  | 89.0(4)  | O16-Dy4-O33                           | 104.7(6) |
| O18-Dy1-O9               | 139.2(4) | O6-Dy3-O14  | 74.2(4)  | O7-Dy4-O9 <sup>i</sup>                | 115.8(4) |
| O18-Dy1-N2               | 71.2(5)  | O6-Dy3-O12  | 144.2(4) | O7-Dy4-O11                            | 73.3(3)  |
| O12-Dy2-O4               | 71.9(4)  | O6-Dy3-O11  | 134.8(4) | O7-Dy4-O16                            | 87.1(4)  |
| O12-Dy2-O9               | 140.4(4) | O6-Dy3-N4   | 65.4(4)  | O7-Dy4-O33                            | 143.9(3) |
| O12-Dy2-O33              | 75.9(3)  | O6-Dy3-O15  | 79.7(5)  | O8-Dy4-O10 <sup>i</sup>               | 73.0(4)  |
| O10-Dy2-O12              | 136.3(4) | O11-Dy3-N4  | 135.0(4) | O8-Dy4-O9 <sup>i</sup>                | 75.6(4)  |

|             |          |            |          |            |          |
|-------------|----------|------------|----------|------------|----------|
| O10-Dy2-O4  | 136.7(4) | O7-Dy3-O14 | 90.3(4)  | O8-Dy4-O11 | 123.6(4) |
| O10-Dy2-O3  | 74.5(4)  | O7-Dy3-O12 | 75.0(4)  | O8-Dy4-O16 | 82.3(5)  |
| O10-Dy2-O9  | 62.7(4)  | O7-Dy3-O4  | 144.5(4) | O8-Dy4-O7  | 68.9(4)  |
| O10-Dy2-O11 | 140.3(4) | O7-Dy3-O6  | 135.8(4) | O8-Dy4-O33 | 145.5(3) |
| O10-Dy2-O23 | 77.8(5)  | O7-Dy3-O11 | 74.3(3)  |            |          |
| O3-Dy2-O4   | 67.1(4)  | O7-Dy3-O15 | 97.6(5)  |            |          |

**Table S3.** Selected bond lengths (Å) and angles (°) of cluster **S-1**.

| <b>Bond lengths (Å)</b>              |          |             |           |                      |           |
|--------------------------------------|----------|-------------|-----------|----------------------|-----------|
| Dy1-O11                              | 2.454(6) | Dy2-O9      | 2.318(6)  | Dy3-O7               | 2.262(5)  |
| Dy1-O12                              | 2.440(7) | Dy2-O10     | 2.365(6)  | Dy3-O15              | 2.393(7)  |
| Dy1-O2 <sup>i</sup>                  | 2.353(7) | Dy2-O8      | 2.328(6)  | Dy4-O11 <sup>i</sup> | 2.399(6)  |
| Dy1-O18                              | 2.322(9) | Dy2-O7      | 2.346(6)  | Dy4-O12 <sup>i</sup> | 2.322(6)  |
| Dy1-O3 <sup>i</sup>                  | 2.273(6) | Dy2-O13     | 2.632(3)  | Dy4-O9               | 2.358(6)  |
| Dy1-O8                               | 2.277(6) | Dy3-O16     | 2.347(7)  | Dy4-O4               | 2.355(6)  |
| Dy1-N2 <sup>i</sup>                  | 2.533(8) | Dy3-O9      | 2.440(6)  | Dy4-O10              | 2.317(5)  |
| Dy1-O19                              | 2.352(8) | Dy3-O4      | 2.246(6)  | Dy4-O3               | 2.342(6)  |
| Dy2-O11                              | 2.365(6) | Dy3-N4      | 2.489(7)  | Dy4-O13              | 2.587(3)  |
| Dy2-O17                              | 2.381(8) | Dy3-O10     | 2.438(6)  | Dy4-O14              | 2.388(9)  |
| Dy2-O12                              | 2.348(6) | Dy3-O6      | 2.351(6)  |                      |           |
| <b>Bond angles (°)</b>               |          |             |           |                      |           |
| O3 <sup>i</sup> -Dy1-O18             | 90.5(3)  | O9-Dy2-O12  | 131.9(2)  | O7-Dy3-O9            | 74.7(2)   |
| O3 <sup>i</sup> -Dy1-O8              | 141.9(2) | O9-Dy2-O10  | 62.5(2)   | O7-Dy3-N4            | 71.4(2)   |
| O3 <sup>i</sup> -Dy1-N2 <sup>i</sup> | 71.1(2)  | O9-Dy2-O8   | 137.8(2)  | O7-Dy3-O10           | 74.40(19) |
| O3 <sup>i</sup> -Dy1-O19             | 97.4(3)  | O9-Dy2-O7   | 75.5(2)   | O7-Dy3-O6            | 136.0(2)  |
| O8-Dy1-O11                           | 75.2(2)  | O9-Dy2-O13  | 75.11(17) | O7-Dy3-O15           | 97.1(3)   |
| O8-Dy1-O12                           | 72.3(2)  | O10-Dy2-O17 | 136.0(2)  | O15-Dy3-O9           | 77.4(2)   |
| O8-Dy1-O2 <sup>i</sup>               | 82.5(2)  | O10-Dy2-O13 | 74.9(2)   | O15-Dy3-N4           | 74.5(2)   |

|                                      |          |             |            |                                        |            |
|--------------------------------------|----------|-------------|------------|----------------------------------------|------------|
| O8-Dy1-O18                           | 103.8(3) | O8-Dy2-O11  | 76.0(2)    | O15-Dy3-O10                            | 137.2(2)   |
| O8-Dy1-N2 <sup>i</sup>               | 145.9(2) | O8-Dy2-O17  | 82.2(3)    | O11 <sup>i</sup> -Dy4-O13              | 78.1(2)    |
| O8-Dy1-O19                           | 90.6(3)  | O8-Dy2-O12  | 73.1(2)    | O12 <sup>i</sup> -Dy4-O11 <sup>i</sup> | 63.1(2)    |
| O19-Dy1-O11                          | 137.4(2) | O8-Dy2-O10  | 124.0(2)   | O12 <sup>i</sup> -Dy4-O9               | 135.2(2)   |
| O19-Dy1-O12                          | 76.7(3)  | O8-Dy2-O7   | 68.41(19)  | O12 <sup>i</sup> -Dy4-O4               | 136.5(2)   |
| O19-Dy1-O2 <sup>i</sup>              | 78.3(3)  | O8-Dy2-O13  | 145.66(15) | O12 <sup>i</sup> -Dy4-O3               | 74.5(2)    |
| O19-Dy1-N2 <sup>i</sup>              | 72.4(3)  | O7-Dy2-O11  | 116.2(2)   | O12 <sup>i</sup> -Dy4-O13              | 76.79(17)  |
| O11-Dy1-N2 <sup>i</sup>              | 136.7(2) | O7-Dy2-O17  | 87.0(3)    | O12 <sup>i</sup> -Dy4-O14              | 76.3(3)    |
| O12-Dy1-O11                          | 60.7(2)  | O7-Dy2-O12  | 139.79(19) | O9-Dy4-O11 <sup>i</sup>                | 140.6(2)   |
| O12-Dy1-N2 <sup>i</sup>              | 128.7(2) | O7-Dy2-O10  | 74.3(2)    | O9-Dy4-O13                             | 75.37(17)  |
| O2 <sup>i</sup> -Dy1-O11             | 136.7(2) | O7-Dy2-O13  | 144.66(14) | O9-Dy4-O14                             | 77.4(3)    |
| O2 <sup>i</sup> -Dy1-O12             | 143.9(3) | O16-Dy3-O9  | 133.2(2)   | O4-Dy4-O11 <sup>i</sup>                | 122.0(2)   |
| O2 <sup>i</sup> -Dy1-N2 <sup>i</sup> | 65.5(2)  | O16-Dy3-N4  | 80.2(2)    | O4-Dy4-O9                              | 71.8(2)    |
| O18-Dy1-O11                          | 77.4(2)  | O16-Dy3-O10 | 73.5(2)    | O4-Dy4-O13                             | 145.08(14) |
| O18-Dy1-O12                          | 137.7(2) | O16-Dy3-O6  | 74.2(2)    | O4-Dy4-O14                             | 80.1(4)    |
| O18-Dy1-O2 <sup>i</sup>              | 72.6(3)  | O16-Dy3-O15 | 149.3(2)   | O10-Dy4-O11 <sup>i</sup>               | 83.2(2)    |
| O18-Dy1-N2 <sup>i</sup>              | 78.4(3)  | O9-Dy3-N4   | 132.2(2)   | O10-Dy4-O12 <sup>i</sup>               | 140.6(2)   |
| O18-Dy1-O19                          | 145.2(3) | O4-Dy3-O16  | 102.0(3)   | O10-Dy4-O9                             | 62.7(2)    |
| O3 <sup>i</sup> -Dy1-O11             | 73.8(2)  | O4-Dy3-O9   | 72.2(2)    | O10-Dy4-O4                             | 78.0(2)    |
| O3 <sup>i</sup> -Dy1-O12             | 73.5(2)  | O4-Dy3-N4   | 143.2(2)   | O10-Dy4-O3                             | 116.8(2)   |
| O3 <sup>i</sup> -Dy1-O2 <sup>i</sup> | 135.6(2) | O4-Dy3-O10  | 77.6(2)    | O10-Dy4-O13                            | 76.6(2)    |
| O11-Dy2-O17                          | 138.3(2) | O4-Dy3-O6   | 79.7(2)    | O10-Dy4-O14                            | 138.7(3)   |
| O11-Dy2-O10                          | 85.2(2)  | O4-Dy3-O7   | 144.3(2)   | O3-Dy4-O11 <sup>i</sup>                | 73.6(2)    |
| O11-Dy2-O13                          | 77.8(2)  | O4-Dy3-O15  | 88.5(3)    | O3-Dy4-O9                              | 138.1(2)   |
| O17-Dy2-O13                          | 103.6(3) | O10-Dy3-O9  | 59.8(2)    | O3-Dy4-O4                              | 67.7(2)    |
| O12-Dy2-O11                          | 63.3(2)  | O10-Dy3-N4  | 136.1(2)   | O3-Dy4-O13                             | 146.40(17) |
| O12-Dy2-O17                          | 76.6(2)  | O6-Dy3-O9   | 143.8(2)   | O3-Dy4-O14                             | 85.6(4)    |
| O12-Dy2-O10                          | 140.4(2) | O6-Dy3-N4   | 65.5(2)    | O14-Dy4-O11 <sup>i</sup>               | 137.9(3)   |

|             |           |            |          |             |          |
|-------------|-----------|------------|----------|-------------|----------|
| O12-Dy2-O13 | 75.45(17) | O6-Dy3-O10 | 135.2(2) | O14-Dy4-O13 | 104.2(5) |
| O9-Dy2-O11  | 142.1(2)  | O6-Dy3-O15 | 79.6(3)  |             |          |
| O9-Dy2-O17  | 74.5(2)   | O7-Dy3-O16 | 90.9(3)  |             |          |

**Table S4.** Selected bond lengths (Å) and angles (°) of cluster *R-2*.

| <b>Bond lengths (Å)</b> |           |             |          |                                       |           |
|-------------------------|-----------|-------------|----------|---------------------------------------|-----------|
| Dy1-O5                  | 2.446(7)  | Dy2-O12     | 2.292(6) | Dy3-O9 <sup>i</sup>                   | 2.377(6)  |
| Dy1-O12                 | 2.365(6)  | Dy2-O3      | 2.435(6) | Dy3-O10                               | 2.382(5)  |
| Dy1-O3                  | 2.246(6)  | Dy2-O11     | 2.366(5) | Dy3-O10 <sup>i</sup>                  | 2.543(6)  |
| Dy1-O14                 | 2.290(7)  | Dy2-N4      | 2.431(7) | Dy3-O11                               | 2.305(5)  |
| Dy1-O6                  | 2.391(6)  | Dy2-O4      | 2.301(6) | Dy3-O16                               | 2.480(7)  |
| Dy1-N2                  | 2.513(9)  | Dy2-O15     | 2.438(7) | Dy3-N6                                | 2.517(8)  |
| Dy1-O2                  | 2.358(7)  | Dy2-O6      | 2.368(5) | Dy3-O17                               | 2.428(7)  |
| Dy1-O13                 | 2.392(10) | Dy3-O7      | 2.423(5) |                                       |           |
| Dy2-O7                  | 2.277(5)  | Dy3-O8      | 2.293(6) |                                       |           |
| <b>Bond angles (°)</b>  |           |             |          |                                       |           |
| O5-Dy1-N2               | 78.1(2)   | O7-Dy2-N4   | 76.2(2)  | O8-Dy3-O10 <sup>i</sup>               | 70.06(19) |
| O12-Dy1-O5              | 134.9(2)  | O7-Dy2-O4   | 77.4(2)  | O8-Dy3-O10                            | 76.34(18) |
| O12-Dy1-O6              | 70.1(2)   | O7-Dy2-O15  | 81.4(2)  | O8-Dy3-O11                            | 134.9(2)  |
| O12-Dy1-N2              | 130.9(2)  | O7-Dy2-O6   | 133.6(2) | O8-Dy3-O16                            | 74.8(2)   |
| O12-Dy1-O13             | 74.7(3)   | O12-Dy2-O3  | 69.3(2)  | O8-Dy3-N6                             | 128.9(2)  |
| O3-Dy1-O5               | 94.2(2)   | O12-Dy2-O11 | 70.7(2)  | O8-Dy3-O17                            | 141.6(2)  |
| O3-Dy1-O12              | 71.3(2)   | O12-Dy2-N4  | 137.8(2) | O9 <sup>i</sup> -Dy3-O7               | 71.9(2)   |
| O3-Dy1-O14              | 143.8(2)  | O12-Dy2-O4  | 114.0(2) | O9 <sup>i</sup> -Dy3-O10              | 124.0(2)  |
| O3-Dy1-O6               | 68.2(2)   | O12-Dy2-O15 | 84.3(2)  | O9 <sup>i</sup> -Dy3-O10 <sup>i</sup> | 61.66(17) |
| O3-Dy1-N2               | 71.0(2)   | O12-Dy2-O6  | 71.8(2)  | O9 <sup>i</sup> -Dy3-O16              | 147.8(2)  |
| O3-Dy1-O2               | 135.9(3)  | O3-Dy2-O15  | 133.4(2) | O9 <sup>i</sup> -Dy3-N6               | 140.7(3)  |
| O3-Dy1-O13              | 95.5(4)   | O11-Dy2-O3  | 124.4(2) | O9 <sup>i</sup> -Dy3-O17              | 70.2(3)   |

|             |           |                         |            |                          |          |
|-------------|-----------|-------------------------|------------|--------------------------|----------|
| O14-Dy1-O5  | 87.4(2)   | O11-Dy2-N4              | 145.5(2)   | O10-Dy3-O7               | 139.4(2) |
| O14-Dy1-O12 | 82.1(2)   | O11-Dy2-O15             | 77.4(2)    | O10-Dy3-O10 <sup>i</sup> | 62.4(2)  |
| O14-Dy1-O6  | 80.1(2)   | O11-Dy2-O6              | 131.9(2)   | O10-Dy3-O16              | 78.8(2)  |
| O14-Dy1-N2  | 143.8(2)  | N4-Dy2-O3               | 88.9(2)    | O10-Dy3-N6               | 64.3(2)  |
| O14-Dy1-O2  | 79.0(2)   | N4-Dy2-O15              | 85.8(2)    | O10-Dy3-O17              | 89.8(2)  |
| O14-Dy1-O13 | 100.8(4)  | O4-Dy2-O3               | 66.41(19)  | O11-Dy3-O7               | 70.2(2)  |
| O6-Dy1-O5   | 64.95(19) | O4-Dy2-O11              | 97.8(2)    | O11-Dy3-O9 <sup>i</sup>  | 90.2(2)  |
| O6-Dy1-N2   | 121.2(3)  | O4-Dy2-N4               | 87.0(2)    | O11-Dy3-O10              | 137.5(2) |
| O6-Dy1-O13  | 144.4(3)  | O4-Dy2-O15              | 158.7(2)   | O11-Dy3-O10 <sup>i</sup> | 144.1(2) |
| O2-Dy1-O5   | 72.9(3)   | O4-Dy2-O6               | 124.61(19) | O11-Dy3-O16              | 83.5(2)  |
| O2-Dy1-O12  | 145.3(3)  | O6-Dy2-O3               | 65.6(2)    | O11-Dy3-N6               | 73.2(2)  |
| O2-Dy1-O6   | 133.4(2)  | O6-Dy2-N4               | 66.3(2)    | O11-Dy3-O17              | 78.2(2)  |
| O2-Dy1-N2   | 65.1(3)   | O6-Dy2-O15              | 70.0(2)    | O16-Dy3-O10 <sup>i</sup> | 132.3(2) |
| O2-Dy1-O13  | 80.6(3)   | O7-Dy3-O10 <sup>i</sup> | 115.8(2)   | O16-Dy3-N6               | 66.9(3)  |
| O13-Dy1-O5  | 150.3(3)  | O7-Dy3-O16              | 76.3(2)    | N6-Dy3-O10 <sup>i</sup>  | 113.8(2) |
| O13-Dy1-N2  | 78.6(4)   | O7-Dy3-N6               | 130.2(2)   | O17-Dy3-O10 <sup>i</sup> | 71.8(2)  |
| O7-Dy2-O12  | 141.8(2)  | O7-Dy3-O17              | 129.8(2)   | O17-Dy3-O16              | 137.9(3) |
| O7-Dy2-O3   | 141.5(2)  | O8-Dy3-O7               | 66.47(17)  | O17-Dy3-N6               | 71.6(3)  |
| O7-Dy2-O11  | 71.69(19) | O8-Dy3-O9 <sup>i</sup>  | 88.1(2)    |                          |          |

**Table S5.** Selected bond lengths (Å) and angles (°) of cluster **S-2**.

| Bond lengths (Å) |          |         |          |                      |          |
|------------------|----------|---------|----------|----------------------|----------|
| Dy1-O12          | 2.370(5) | Dy2-O12 | 2.294(5) | Dy3-O9 <sup>i</sup>  | 2.378(6) |
| Dy1-O5           | 2.438(6) | Dy2-O15 | 2.428(6) | Dy3-O10              | 2.373(4) |
| Dy1-O3           | 2.248(6) | Dy2-O11 | 2.358(5) | Dy3-O10 <sup>i</sup> | 2.554(5) |
| Dy1-O14          | 2.282(6) | Dy2-O3  | 2.434(5) | Dy3-O11              | 2.314(4) |
| Dy1-O6           | 2.405(5) | Dy2-O4  | 2.299(5) | Dy3-O16              | 2.456(7) |
| Dy1-O2           | 2.352(6) | Dy2-O6  | 2.379(5) | Dy3-N6               | 2.517(7) |

|                        |            |             |            |                                       |            |
|------------------------|------------|-------------|------------|---------------------------------------|------------|
| Dy1-N2                 | 2.552(8)   | Dy2-N4      | 2.421(7)   | Dy3-O17                               | 2.414(7)   |
| Dy1-O13                | 2.391(9)   | Dy3-O7      | 2.427(5)   |                                       |            |
| Dy2-O7                 | 2.289(4)   | Dy3-O8      | 2.300(5)   |                                       |            |
| <b>Bond angles (°)</b> |            |             |            |                                       |            |
| O12-Dy1-O5             | 135.23(18) | O7-Dy2-O3   | 141.6(2)   | O8-Dy3-O10                            | 76.46(17)  |
| O12-Dy1-O6             | 70.45(18)  | O7-Dy2-O4   | 77.68(19)  | O8-Dy3-O11                            | 134.50(18) |
| O12-Dy1-N2             | 131.0(2)   | O7-Dy2-O6   | 133.08(19) | O8-Dy3-O16                            | 75.0(2)    |
| O12-Dy1-O13            | 74.6(2)    | O7-Dy2-N4   | 76.17(18)  | O8-Dy3-N6                             | 128.6(2)   |
| O5-Dy1-N2              | 77.5(2)    | O12-Dy2-O15 | 84.4(2)    | O8-Dy3-O17                            | 142.3(2)   |
| O3-Dy1-O12             | 71.5(2)    | O12-Dy2-O11 | 70.51(17)  | O9 <sup>i</sup> -Dy3-O7               | 71.71(19)  |
| O3-Dy1-O5              | 93.8(2)    | O12-Dy2-O3  | 69.6(2)    | O9 <sup>i</sup> -Dy3-O10 <sup>i</sup> | 61.91(16)  |
| O3-Dy1-O14             | 143.30(19) | O12-Dy2-O4  | 113.9(2)   | O9 <sup>i</sup> -Dy3-O16              | 147.6(2)   |
| O3-Dy1-O6              | 68.0(2)    | O12-Dy2-O6  | 72.20(19)  | O9 <sup>i</sup> -Dy3-N6               | 141.2(2)   |
| O3-Dy1-O2              | 136.3(2)   | O12-Dy2-N4  | 137.80(19) | O9 <sup>i</sup> -Dy3-O17              | 70.9(2)    |
| O3-Dy1-N2              | 71.0(2)    | O15-Dy2-O3  | 133.32(18) | O10-Dy3-O7                            | 139.19(18) |
| O3-Dy1-O13             | 95.3(4)    | O11-Dy2-O15 | 77.2(2)    | O10-Dy3-O9 <sup>i</sup>               | 124.37(18) |
| O14-Dy1-O12            | 82.1(2)    | O11-Dy2-O3  | 124.8(2)   | O10-Dy3-O10 <sup>i</sup>              | 62.5(2)    |
| O14-Dy1-O5             | 87.2(2)    | O11-Dy2-O6  | 131.89(19) | O10-Dy3-O16                           | 78.8(2)    |
| O14-Dy1-O6             | 79.5(2)    | O11-Dy2-N4  | 145.56(19) | O10-Dy3-N6                            | 64.27(18)  |
| O14-Dy1-O2             | 79.0(2)    | O4-Dy2-O15  | 158.67(19) | O10-Dy3-O17                           | 89.7(2)    |
| O14-Dy1-N2             | 144.01(18) | O4-Dy2-O11  | 98.08(19)  | O11-Dy3-O7                            | 70.13(19)  |
| O14-Dy1-O13            | 101.8(4)   | O4-Dy2-O3   | 66.42(17)  | O11-Dy3-O9 <sup>i</sup>               | 90.20(19)  |
| O6-Dy1-O5              | 64.88(16)  | O4-Dy2-O6   | 124.55(17) | O11-Dy3-O10                           | 137.36(19) |
| O6-Dy1-N2              | 120.8(2)   | O4-Dy2-N4   | 87.0(2)    | O11-Dy3-O10 <sup>i</sup>              | 144.37(19) |
| O2-Dy1-O12             | 145.0(3)   | O6-Dy2-O15  | 69.94(18)  | O11-Dy3-O16                           | 82.9(2)    |
| O2-Dy1-O5              | 73.0(3)    | O6-Dy2-O3   | 65.53(18)  | O11-Dy3-N6                            | 73.13(18)  |
| O2-Dy1-O6              | 133.2(2)   | O6-Dy2-N4   | 65.9(2)    | O11-Dy3-O17                           | 78.2(2)    |
| O2-Dy1-N2              | 65.5(2)    | N4-Dy2-O15  | 85.8(2)    | O16-Dy3-O10 <sup>i</sup>              | 132.58(18) |



|            |            |                         |            |                          |          |
|------------|------------|-------------------------|------------|--------------------------|----------|
| O2-Dy1-O13 | 80.8(3)    | N4-Dy2-O3               | 88.5(2)    | O16-Dy3-N6               | 66.3(2)  |
| O13-Dy1-O5 | 150.1(2)   | O7-Dy3-O10 <sup>i</sup> | 115.86(19) | N6-Dy3-O10 <sup>i</sup>  | 114.0(2) |
| O13-Dy1-O6 | 144.5(2)   | O7-Dy3-O16              | 76.21(19)  | O17-Dy3-O7               | 130.1(2) |
| O13-Dy1-N2 | 78.7(3)    | O7-Dy3-N6               | 129.8(2)   | O17-Dy3-O10 <sup>i</sup> | 72.2(2)  |
| O7-Dy2-O12 | 141.73(19) | O8-Dy3-O7               | 66.23(16)  | O17-Dy3-O16              | 137.1(3) |
| O7-Dy2-O15 | 81.1(2)    | O8-Dy3-O9 <sup>i</sup>  | 88.1(2)    | O17-Dy3-N6               | 71.4(3)  |
| O7-Dy2-O11 | 71.80(18)  | O8-Dy3-O10 <sup>i</sup> | 70.30(18)  |                          |          |

**Table S6.** *SHAPE* analysis of the Dy(III) in cluster **R-1**.

| Label    | Shape    | Symmetry                                        | Distortion (°) |        |        |        |
|----------|----------|-------------------------------------------------|----------------|--------|--------|--------|
|          |          |                                                 | Dy1            | Dy2    | Dy3    | Dy4    |
| OP-8     | $D_{8h}$ | Octagon                                         | 29.039         | 26.380 | 28.903 | 25.933 |
| HPY-8    | $C_{7v}$ | Heptagonal pyramid                              | 23.562         | 20.673 | 24.159 | 21.238 |
| HBPY-8   | $D_{6h}$ | Hexagonal bipyramid                             | 15.482         | 16.685 | 15.109 | 16.540 |
| CU-8     | $O_h$    | Cube                                            | 12.733         | 11.994 | 12.535 | 12.412 |
| SAPR-8   | $D_{4d}$ | Square antiprism                                | 2.343          | 1.381  | 2.549  | 1.405  |
| TDD-8    | $D_{2d}$ | Triangular dodecahedron                         | 0.988          | 2.007  | 1.144  | 2.157  |
| JGBF-8   | $D_{2d}$ | Johnson-Gyrobifastigium<br>(J26)                | 11.566         | 15.608 | 11.001 | 14.908 |
| JETBPY-8 | $D_{3h}$ | Johnson-Elongated triangular<br>bipyramid (J14) | 26.905         | 25.956 | 27.183 | 26.131 |
| JBTP-8   | $C_{2v}$ | Johnson-Biaugmented<br>trigonal prism (J50)     | 2.272          | 2.874  | 2.349  | 2.707  |
| BTPR-8   | $C_{2v}$ | Biaugmented trigonal prism                      | 2.007          | 1.780  | 2.101  | 1.679  |
| JSD-8    | $D_{2d}$ | Snub disphenoid (J84)                           | 2.074          | 4.669  | 2.142  | 4.537  |
| TT-8     | $T_d$    | Triakis tetrahedron                             | 13.451         | 12.327 | 13.230 | 12.891 |
| ETBPY-8  | $D_{3h}$ | Elongated trigonal bipyramid                    | 23.431         | 21.220 | 23.916 | 21.790 |

**Table S7.** *SHAPE* analysis of the Dy(III) in cluster **S-1**.

| Label    | Shape    | Symmetry                                        | Distortion (°) |        |        |        |
|----------|----------|-------------------------------------------------|----------------|--------|--------|--------|
|          |          |                                                 | Dy1            | Dy2    | Dy3    | Dy4    |
| OP-8     | $D_{8h}$ | Octagon                                         | 28.913         | 26.853 | 28.939 | 26.120 |
| HPY-8    | $C_{7v}$ | Heptagonal pyramid                              | 23.556         | 20.752 | 23.962 | 21.381 |
| HBPY-8   | $D_{6h}$ | Hexagonal bipyramid                             | 15.551         | 16.618 | 14.923 | 16.306 |
| CU-8     | $O_h$    | Cube                                            | 12.685         | 11.874 | 12.407 | 12.373 |
| SAPR-8   | $D_{4d}$ | Square antiprism                                | 2.2853         | 1.434  | 2.516  | 1.387  |
| TDD-8    | $D_{2d}$ | Triangular dodecahedron                         | 0.997          | 1.894  | 1.179  | 2.046  |
| JGBF-8   | $D_{2d}$ | Johnson-Gyrobifastigium<br>(J26)                | 11.671         | 15.434 | 10.862 | 14.732 |
| JETBPY-8 | $D_{3h}$ | Johnson-Elongated triangular<br>bipyramid (J14) | 26.883         | 26.364 | 27.075 | 26.640 |
| JBTP-8   | $C_{2v}$ | Johnson-Biaugmented<br>trigonal prism (J50)     | 2.198          | 2.805  | 2.409  | 2.698  |
| BTPR-8   | $C_{2v}$ | Biaugmented trigonal prism                      | 1.937          | 1.679  | 2.157  | 1.619  |
| JSD-8    | $D_{2d}$ | Snub disphenoid (J84)                           | 2.095          | 4.595  | 2.104  | 4.471  |
| TT-8     | $T_d$    | Triakis tetrahedron                             | 13.408         | 12.213 | 13.174 | 12.825 |
| ETBPY-8  | $D_{3h}$ | Elongated trigonal<br>bipyramid(see8)           | 23.374         | 21.678 | 23.815 | 22.345 |

**Table S8.** SHAPE analysis of the Dy(III) in cluster **R-2**.

| Label  | Shape    | Symmetry                | Distortion (°) |        |
|--------|----------|-------------------------|----------------|--------|
|        |          |                         | Dy1            | Dy2    |
| OP-8   | $D_{8h}$ | Octagon                 | 30.797         | 31.379 |
| HPY-8  | $C_{7v}$ | Heptagonal pyramid      | 23.531         | 23.404 |
| HBPY-8 | $D_{6h}$ | Hexagonal bipyramid     | 16.395         | 13.466 |
| CU-8   | $O_h$    | Cube                    | 11.640         | 12.415 |
| SAPR-8 | $D_{4d}$ | Square antiprism        | 3.024          | 3.501  |
| TDD-8  | $D_{2d}$ | Triangular dodecahedron | 0.898          | 2.599  |

|          |          |                                                 |        |        |
|----------|----------|-------------------------------------------------|--------|--------|
| JGBF-8   | $D_{2d}$ | Johnson-Gyrobifastigium (J26)                   | 12.666 | 10.371 |
| JETBPY-8 | $D_{3h}$ | Johnson-Elongated triangular<br>bipyramid (J14) | 29.434 | 27.263 |
| JBTP-8   | $C_{2v}$ | Johnson-Biaugmented trigonal<br>prism (J50)     | 3.148  | 2.912  |
| BTPR-8   | $C_{2v}$ | Biaugmented trigonal prism                      | 2.696  | 1.767  |
| JSD-8    | $D_{2d}$ | Snub disphenoid (J84)                           | 2.747  | 4.335  |
| TT-8     | $T_d$    | Triakis tetrahedron                             | 12.372 | 13.149 |
| ETBPY-8  | $D_{3h}$ | Elongated trigonal bipyramid                    | 24.815 | 22.827 |

| Label    | Shape    | Symmetry                      | Distortion (°) |  |
|----------|----------|-------------------------------|----------------|--|
|          |          |                               | Dy3            |  |
| EP-9     | $D_{9h}$ | Enneagon                      | 34.168         |  |
| OPY-9    | $C_{8v}$ | Octagonal pyramid             | 22.796         |  |
| HBPY-9   | $D_{7h}$ | Heptagonal bipyramid          | 17.267         |  |
| JTC-9    | $C_{3v}$ | Triangular cupola J3          | 15.016         |  |
| JCCU-9   | $C_{4v}$ | Capped cube (J8)              | 8.664          |  |
| CCU-9    | $C_4$    | Capped cube                   | 7.378          |  |
| JCSAPR-9 | $C_{4v}$ | Capped sq. antiprism          | 2.254          |  |
| CSAPR-9  | $C_{4v}$ | Capped square antiprism       | 1.229          |  |
| JTCTPR-9 | $D_{3h}$ | Tricapped trigonal prism J51  | 2.012          |  |
| TCTPR-9  | $D_{3h}$ | Tricapped trigonal prism      | 1.251          |  |
| JTDIC-9  | $C_{3v}$ | Tridiminished icosahedron J63 | 12.771         |  |
| HH-9     | $C_{2v}$ | Hula-hoop                     | 10.110         |  |
| MFF-9    | $C_s$    | Muffin                        | 1.335          |  |

**Table S9.** *SHAPE* analysis of the Dy(III) in cluster *S-2*.

| Label | Shape    | Symmetry | Distortion (°) |        |
|-------|----------|----------|----------------|--------|
|       |          |          | Dy1            | Dy2    |
| OP-8  | $D_{8h}$ | Octagon  | 30.940         | 31.285 |

|          |          |                                                 |        |        |
|----------|----------|-------------------------------------------------|--------|--------|
| HPY-8    | $C_{7v}$ | Heptagonal pyramid                              | 23.682 | 23.506 |
| HBPY-8   | $D_{6h}$ | Hexagonal bipyramid                             | 16.282 | 13.509 |
| CU-8     | $O_h$    | Cube                                            | 11.733 | 12.523 |
| SAPR-8   | $D_{4d}$ | Square antiprism                                | 3.081  | 3.505  |
| TDD-8    | $D_{2d}$ | Triangular dodecahedron                         | 0.887  | 2.627  |
| JGBF-8   | $D_{2d}$ | Johnson-Gyrobifastigium<br>(J26)                | 12.734 | 10.331 |
| JETBPY-8 | $D_{3h}$ | Johnson-Elongated triangular<br>bipyramid (J14) | 29.067 | 27.142 |
| JBTP-8   | $C_{2v}$ | Johnson-Biaugmented trigonal<br>prism (J50)     | 3.178  | 2.954  |
| BTPR-8   | $C_{2v}$ | Biaugmented trigonal prism                      | 2.549  | 1.832  |
| JSD-8    | $D_{2d}$ | Snub disphenoid (J84)                           | 2.561  | 4.313  |
| TT-8     | $T_d$    | Triakis tetrahedron                             | 12.410 | 13.212 |
| ETBPY-8  | $D_{3h}$ | Elongated trigonal bipyramid                    | 25.398 | 22.628 |

| <b>Label</b> | <b>Shape</b> | <b>Symmetry</b>               | <b>Distortion (°)</b><br><b>Dy3</b> |
|--------------|--------------|-------------------------------|-------------------------------------|
| EP-9         | $D_{9h}$     | Enneagon                      | 34.183                              |
| OPY-9        | $C_{8v}$     | Octagonal pyramid             | 22.825                              |
| HBPY-9       | $D_{7h}$     | Heptagonal bipyramid          | 17.247                              |
| JTC-9        | $C_{3v}$     | Triangular cupola J3          | 15.035                              |
| JCCU-9       | $C_{4v}$     | Capped cube (J8)              | 8.579                               |
| CCU-9        | $C_4$        | Capped cube                   | 7.350                               |
| JCSAPR-9     | $C_{4v}$     | Capped sq. antiprism          | 2.255                               |
| CSAPR-9      | $C_{4v}$     | Capped square antiprism       | 1.227                               |
| JTCTPR-9     | $D_{3h}$     | Tricapped trigonal prism J51  | 1.961                               |
| TCTPR-9      | $D_{3h}$     | Tricapped trigonal prism      | 1.257                               |
| JTDIC-9      | $C_{3v}$     | Tridiminished icosahedron J63 | 12.762                              |

|       |          |           |        |
|-------|----------|-----------|--------|
| HH-9  | $C_{2v}$ | Hula-hoop | 10.137 |
| MFF-9 | $C_s$    | Muffin    | 1.314  |

**Table S10.** Parameters from the fitting result of the Cole-Cole plots for the **R-1** under 0 Oe field.

| Temp.(K) | <b>R-1</b>   |              |              |
|----------|--------------|--------------|--------------|
|          | $\tau$       | $\alpha$     | residual     |
| 5.0      | 0.296032E-03 | 0.244656E+00 | 0.143606E+00 |
| 4.7      | 0.396460E-03 | 0.264993E+00 | 0.191508E+00 |
| 4.4      | 0.531762E-03 | 0.285873E+00 | 0.243871E+00 |
| 4.1      | 0.715844E-03 | 0.303777E+00 | 0.318819E+00 |
| 3.8      | 0.966411E-03 | 0.323445E+00 | 0.380225E+00 |
| 3.5      | 0.131679E-02 | 0.344271E+00 | 0.453641E+00 |
| 3.2      | 0.187588E-02 | 0.364864E+00 | 0.525670E+00 |
| 2.9      | 0.285038E-02 | 0.388242E+00 | 0.584445E+00 |
| 2.6      | 0.466894E-02 | 0.413761E+00 | 0.887917E+00 |
| 2.3      | 0.851159E-02 | 0.446712E+00 | 0.550999E+00 |
| 2.0      | 0.169600E-01 | 0.490874E+00 | 0.394759E+00 |

**Table S11.** Parameters from the fitting result of the Cole-Cole plots for the **R-2** under 0 Oe field.

| Temp.(K) | <b>R-2</b>   |              |              |
|----------|--------------|--------------|--------------|
|          | $\tau$       | $\alpha$     | residual     |
| 2.0      | 0.185721E-03 | 0.305145E+00 | 0.702823E-01 |
| 2.5      | 0.174744E-03 | 0.273494E+00 | 0.682148E-01 |
| 3.0      | 0.165713E-03 | 0.256340E+00 | 0.588019E-01 |
| 3.5      | 0.158271E-03 | 0.244586E+00 | 0.545725E-01 |
| 4.0      | 0.150792E-03 | 0.236670E+00 | 0.456045E-01 |
| 4.5      | 0.141043E-03 | 0.234421E+00 | 0.352555E-01 |
| 5.0      | 0.132836E-03 | 0.227043E+00 | 0.328097E-01 |
| 5.5      | 0.123869E-03 | 0.222413E+00 | 0.263064E-01 |
| 6.0      | 0.113927E-03 | 0.215366E+00 | 0.218576E-01 |
| 6.5      | 0.102865E-03 | 0.211176E+00 | 0.156278E-01 |
| 7.0      | 0.924204E-04 | 0.204779E+00 | 0.118463E-01 |
| 7.5      | 0.632913E-06 | 0.691005E+00 | 0.365156E+01 |
| 8.0      | 0.516291E-05 | 0.337087E+00 | 0.127491E-01 |
| 8.5      | 0.396282E-05 | 0.313579E+00 | 0.767048E-02 |
| 9.0      | 0.303176E-05 | 0.287576E+00 | 0.500746E-02 |
| 9.5      | 0.233652E-05 | 0.254981E+00 | 0.396000E-02 |
| 10.0     | 0.124680E-05 | 0.280504E+00 | 0.839930E-01 |

**Table S12.** Parameters from the fitting result of the Cole-Cole plots for the **R-2** under 1000 Oe field.

| Temp.(K) | <b>R-2</b>   |              |              |
|----------|--------------|--------------|--------------|
|          | $\tau$       | $\alpha$     | residual     |
| 2.0      | 0.541202E-03 | 0.309313E+00 | 0.331614E+00 |
| 2.5      | 0.431551E-03 | 0.298966E+00 | 0.191431E+00 |
| 3.0      | 0.355077E-03 | 0.307415E+00 | 0.923385E+00 |
| 3.5      | 0.317890E-03 | 0.281377E+00 | 0.101769E+00 |
| 4.0      | 0.293437E-03 | 0.249301E+00 | 0.590389E+00 |
| 4.5      | 0.233407E-03 | 0.275505E+00 | 0.937777E+00 |
| 5.0      | 0.218947E-03 | 0.240321E+00 | 0.811918E-01 |
| 5.5      | 0.116915E-03 | 0.376318E+00 | 0.500788E+01 |
| 6.0      | 0.155960E-03 | 0.237343E+00 | 0.364479E-01 |
| 6.5      | 0.136306E-03 | 0.218145E+00 | 0.321418E-01 |
| 7.0      | 0.112108E-03 | 0.216957E+00 | 0.229871E-01 |
| 7.5      | 0.131769E-03 | 0.437632E+00 | 0.468881E+01 |
| 8.0      | 0.182822E-03 | 0.505731E+00 | 0.488010E-01 |
| 8.5      | 0.155999E-03 | 0.102493E+00 | 0.406885E-01 |
| 9.0      | 0.204887E-03 | 0.129780E+00 | 0.440238E+00 |
| 9.5      | 0.127147E-03 | 0.510891E+00 | 0.448092E-01 |
| 10.0     | 0.928791E-04 | 0.130480E+00 | 0.105949E-01 |

**Table S13.** Parameters from the fitting result of the Cole-Cole plots for the **S-1** under 0 Oe field.

| Temp.(K) | <b>S-1</b>   |              |              |
|----------|--------------|--------------|--------------|
|          | $\tau$       | $\alpha$     | residual     |
| 2.0      | 0.135298E-01 | 0.476624E+00 | 0.271138E+01 |
| 2.3      | 0.610367E-02 | 0.440763E+00 | 0.413320E+01 |
| 2.6      | 0.328692E-02 | 0.400390E+00 | 0.187731E+01 |
| 2.9      | 0.191202E-02 | 0.359570E+00 | 0.303056E+01 |
| 3.2      | 0.129758E-02 | 0.322138E+00 | 0.338158E+01 |
| 3.5      | 0.938169E-03 | 0.291340E+00 | 0.307369E+01 |
| 3.8      | 0.712833E-03 | 0.256317E+00 | 0.311767E+01 |
| 4.1      | 0.538181E-03 | 0.246634E+00 | 0.243062E+01 |
| 4.4      | 0.413947E-03 | 0.218830E+00 | 0.294600E+01 |
| 4.7      | 0.307372E-03 | 0.211419E+00 | 0.232269E+01 |
| 5.0      | 0.224999E-03 | 0.188957E+00 | 0.214014E+01 |

**Table S14.** Parameters from the fitting result of the Cole-Cole plots for the **S-2** under 0 Oe field.

|  | <b>S-2</b> |  |  |
|--|------------|--|--|
|  |            |  |  |

| Temp.(K) | $\tau$       | $\alpha$     | residual     |
|----------|--------------|--------------|--------------|
| 2.0      | 0.880020E-04 | 0.225023E+00 | 0.361788E+01 |
| 2.3      | 0.706370E-04 | 0.206747E+00 | 0.267288E+01 |
| 2.6      | 0.523292E-04 | 0.214592E+00 | 0.278556E+01 |
| 2.9      | 0.345059E-04 | 0.246159E+00 | 0.210347E+01 |
| 3.2      | 0.132563E-04 | 0.250346E+00 | 0.236751E+01 |
| 3.5      | 0.802929E-05 | 0.282038E+00 | 0.170793E+01 |
| 3.8      | 0.770223E-05 | 0.234678E+00 | 0.185850E+01 |
| 4.1      | 0.476622E-05 | 0.299269E+00 | 0.136504E+01 |
| 4.4      | 0.506427E-05 | 0.235104E+00 | 0.123434E+01 |
| 4.7      | 0.446807E-05 | 0.215544E+00 | 0.130343E+01 |
| 5.0      | 0.337152E-05 | 0.235373E+00 | 0.153139E+01 |
| 5.3      | 0.230348E-05 | 0.271925E+00 | 0.135585E+01 |
| 5.6      | 0.249579E-05 | 0.208922E+00 | 0.992459E+00 |
| 5.9      | 0.609087E-06 | 0.393802E+00 | 0.738501E+00 |
| 6.2      | 0.248039E-06 | 0.468510E+00 | 0.109518E+01 |
| 6.5      | 0.445975E-08 | 0.672717E+00 | 0.110266E+01 |
| 6.8      | 0.101401E-06 | 0.487992E+00 | 0.865128E+00 |
| 7.1      | 0.710081E-06 | 0.239767E+00 | 0.628120E+00 |
| 7.4      | 0.115485E-05 | 0.111022E+00 | 0.710321E+00 |
| 7.7      | 0.429028E-06 | 0.229864E+00 | 0.749382E+00 |
| 8.0      | 0.628262E-07 | 0.392412E+00 | 0.513175E+00 |

**Table S15.** Parameters from the fitting result of the Cole-Cole plots for the **S-2** under 1000 Oe field.

| Temp.(K) | <b>S-2</b>   |              |              |
|----------|--------------|--------------|--------------|
|          | $\tau$       | $\alpha$     | residual     |
| 2.0      | 0.336352E-03 | 0.245833E+00 | 0.632162E+01 |
| 2.3      | 0.242788E-03 | 0.353511E+00 | 0.439253E+01 |
| 2.6      | 0.238893E-03 | 0.350188E+00 | 0.252197E+01 |
| 2.9      | 0.140517E-03 | 0.347542E+00 | 0.459260E+01 |
| 3.2      | 0.180169E-03 | 0.199521E+00 | 0.280702E+01 |
| 3.5      | 0.719531E-04 | 0.398869E+00 | 0.296640E+01 |
| 3.8      | 0.121984E-03 | 0.325708E+00 | 0.200484E+01 |
| 4.1      | 0.146031E-03 | 0.145569E+00 | 0.242994E+01 |
| 4.4      | 0.658355E-04 | 0.266245E+00 | 0.348647E+01 |
| 4.7      | 0.123830E-04 | 0.480555E+00 | 0.215046E+01 |
| 5.0      | 0.949058E-04 | 0.214635E+00 | 0.163073E+01 |
| 5.3      | 0.591531E-04 | 0.260118E+00 | 0.226805E+01 |
| 5.6      | 0.832576E-04 | 0.169373E+00 | 0.125811E+01 |
| 5.9      | 0.344110E-05 | 0.430653E+00 | 0.169145E+01 |
| 6.2      | 0.212198E-05 | 0.461314E+00 | 0.133442E+01 |

|     |              |              |              |
|-----|--------------|--------------|--------------|
| 6.5 | 0.496981E-05 | 0.259048E+00 | 0.169675E+01 |
| 6.8 | 0.492712E-05 | 0.210584E+00 | 0.845698E+00 |
